# Supplementary material for: Cross-sectional analysis of the association between household food insecurity and mental health conditions in children aged 5–11 years in Canada
Source: PubMed Central journal article supplement — BMJ Open. 2024 Jun 25;14(6):e081538. doi: 10.1136/bmjopen-2023-081538 (PMC11202637; doi:10.1136/bmjopen-2023-081538), 2024-06-25
Supplement: bmjopen-2023-081538.draft_revisions.pdf [file bmjopen-2023-081538.draft_revisions.pdf]

# BMJ Open

BMJ Open is committed to open peer review. As part of this commitment we make the peer review history of every article we publish publicly available.

When an article is published we post the peer reviewers' comments and the authors' responses online. We also post the versions of the paper that were used during peer review. These are the versions that the peer review comments apply to.

The versions of the paper that follow are the versions that were submitted during the peer review process. They are not the versions of record or the final published versions. They should not be cited or distributed as the published version of this manuscript.

BMJ Open is an open access journal and the full, final, typeset and author-corrected version of record of the manuscript is available on our site with no access controls, subscription charges or pay-per-view fees (<http://bmjopen.bmj.com>).

If you have any questions on BMJ Open's open peer review process please email [info.bmjopen@bmj.com](mailto:info.bmjopen@bmj.com)

# BMJ Open

## A cross-sectional analysis of the association between household food insecurity and mental health conditions in children aged 5 to 11 years in Ontario

|                               |                                                                                                                                                                                                                                                                                                                                                                                                                                                                                                |
|-------------------------------|------------------------------------------------------------------------------------------------------------------------------------------------------------------------------------------------------------------------------------------------------------------------------------------------------------------------------------------------------------------------------------------------------------------------------------------------------------------------------------------------|
| Journal:                      | <i>BMJ Open</i>                                                                                                                                                                                                                                                                                                                                                                                                                                                                                |
| Manuscript ID                 | bmjopen-2023-081538                                                                                                                                                                                                                                                                                                                                                                                                                                                                            |
| Article Type:                 | Original research                                                                                                                                                                                                                                                                                                                                                                                                                                                                              |
| Date Submitted by the Author: | 30-Oct-2023                                                                                                                                                                                                                                                                                                                                                                                                                                                                                    |
| Complete List of Authors:     | Thielman, Justin; Public Health Ontario, Health Promotion, Chronic Disease & Injury Prevention<br>Orr, Sarah; Public Health Ontario, Health Promotion, Chronic, Disease and Injury Prevention<br>Naraentheraraja, Saranya; University of Toronto, Dalla Lana School of Public Health<br>Harrington, Daniel; Public Health Ontario, Health Promotion, Chronic Disease and Injury Prevention<br>Carsley, Sarah; Public Health Ontario; University of Toronto, Dalla Lana School of Public Health |
| Keywords:                     | MENTAL HEALTH, EPIDEMIOLOGY, NUTRITION & DIETETICS, PAEDIATRICS, PUBLIC HEALTH                                                                                                                                                                                                                                                                                                                                                                                                                 |
|                               |                                                                                                                                                                                                                                                                                                                                                                                                                                                                                                |

SCHOLARONE™  
Manuscripts

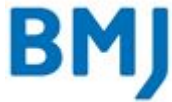

I, the Submitting Author has the right to grant and does grant on behalf of all authors of the Work (as defined in the below author licence), an exclusive licence and/or a non-exclusive licence for contributions from authors who are: i) UK Crown employees; ii) where BMJ has agreed a CC-BY licence shall apply, and/or iii) in accordance with the terms applicable for US Federal Government officers or employees acting as part of their official duties; on a worldwide, perpetual, irrevocable, royalty-free basis to BMJ Publishing Group Ltd ("BMJ") its licensees and where the relevant Journal is co-owned by BMJ to the co-owners of the Journal, to publish the Work in this journal and any other BMJ products and to exploit all rights, as set out in our [licence](#).

The Submitting Author accepts and understands that any supply made under these terms is made by BMJ to the Submitting Author unless you are acting as an employee on behalf of your employer or a postgraduate student of an affiliated institution which is paying any applicable article publishing charge ("APC") for Open Access articles. Where the Submitting Author wishes to make the Work available on an Open Access basis (and intends to pay the relevant APC), the terms of reuse of such Open Access shall be governed by a Creative Commons licence – details of these licences and which [Creative Commons](#) licence will apply to this Work are set out in our licence referred to above.

Other than as permitted in any relevant BMJ Author's Self Archiving Policies, I confirm this Work has not been accepted for publication elsewhere, is not being considered for publication elsewhere and does not duplicate material already published. I confirm all authors consent to publication of this Work and authorise the granting of this licence.

## A cross-sectional analysis of the association between household food insecurity and mental health conditions in children aged 5 to 11 years in Ontario

Justin Thielman MSc,<sup>1</sup> Sarah Orr PhD,<sup>1</sup> Saranya Naraentheraraja MMASc MPH,<sup>2</sup> Daniel W. Harrington PhD,<sup>1</sup> Sarah Carsley PhD<sup>1,2</sup>

### Affiliations

1. Department of Health Promotion, Chronic, Disease and Injury Prevention, Public Health Ontario, Toronto, Canada
2. Dalla Lana School of Public Health, University of Toronto, Toronto, Canada

### Corresponding Author

Sarah Carsley  
661 University Avenue, Suite 1701  
Toronto, ON  
M5G 1M1  
[Sarah.carsley@oahpp.ca](mailto:Sarah.carsley@oahpp.ca)

Keywords: food insecurity, mental health, children, public health, epidemiology

Conflicts of Interest: None to declare

Funding Sources: None

Ethics approval: Approved by the Ethics Review Board of Public Health Ontario  
(File number: 2022-003.01)

**What is already known on this topic** - summarise the state of scientific knowledge on this subject before you did your study and why this study needed to be done

The association between household food insecurity and mental health diagnoses has been established in adolescents and adults however there is less evidence to support this association in younger children.

**What this study adds** - summarise what we now know as a result of this study that we did not know before

This study provides empirical evidence from a provincially representative sample of children aged 5 to 11 years that household food insecurity is associated with the presence of mental health conditions in a dose-response; meaning increasing severity of household food insecurity is associated with higher odds of mental health conditions.

**How this study might affect research, practice or policy** - summarise the implications of this study

Children living in households at any level of food insecurity are at increased risk of mental health conditions therefore public policies are needed to support families with young children both financially and through providing adequate mental health services in the community.

## Abstract (word count: 250)

**Background:** Children living in food insecure households have poorer mental health outcomes compared to their food-secure peers; however, the relationship between severity of food insecurity and diagnosed mental health conditions in young children remains unknown. This study examined the association between household food insecurity and reported diagnosed mental health conditions among children aged 5-11 years in Ontario, Canada.

**Methods:** This study included 10,062 children aged 5-11 years living in Ontario, from the 2019 Canadian Health Survey on Children and Youth. We measured household food insecurity using the Household Food Security Survey Module. We measured diagnosed mental health conditions by parent/caregiver-report of physician-diagnosed anxiety, depression, autism spectrum disorder or attention-deficit/hyperactive disorder. We developed a multivariable logistic regression model to assess the association between severities of food insecurity and mental health, controlling for potentially confounding variables.

**Results:** 15.9% of children lived in households reporting some level of food insecurity (5.3% marginal, 7.4% moderate, and 3.3% severe). The prevalence of at least one diagnosed mental health condition in the same population was 9.6%. After adjusting for socio-demographic characteristics, children from marginal, moderate and severe food insecure households had a 1.57 (95% CI 0.97-2.55), 1.54 (95% CI 1.07-2.20) and 2.15 (95% CI 1.36-3.38) increased odds of having a diagnosed mental health condition, respectively.

**Conclusion:** Household food insecurity is associated with an increased presence of diagnosed mental health conditions in children. This study adds to the body of research showing that social and economic inequities, including household food insecurity, negatively impact the health of children.

## Strengths and Limitations of this Study

- This study analyzed a large sample that was representative of the broader Ontario population of children aged 5 to 11, so results are generalizable across this population.
- This study was able to control for a variety of socio-demographic, family, and economic variables, including parent/caregiver mental health, which reduces the risk of confounding by another variable.
- This study relies on parent/caregiver reports of household food insecurity and child mental health, which may not reflect true levels of food insecurity and mental health diagnoses.
- This is a cross-sectional study and is therefore unable to determine whether household food insecurity causes increased mental health diagnoses among children.

## Background (word count: 2785)

The prevalence of mental health conditions in children and youth is estimated at about 1 in 5 in Ontario, Canada.<sup>1</sup> Prior to COVID-19, previous studies showed increasing trends in the prevalence of some mental health conditions, particularly attention-deficit/hyperactive disorder (ADHD) in boys, and in the perceived need for professional help over the past 30 years.<sup>2</sup> Likewise, data from a nationally representative sample in Canada showed an increased prevalence of poor/fair mental health, anxiety and depression disorders, and increased mental health services since 2011.<sup>3</sup> Since 2020, emerging evidence indicates the COVID-19 pandemic likely exacerbated mental health issues in children and youth.<sup>4</sup>

Longitudinal research has found that mental health conditions in adolescence can have adverse health impacts in later life, such as lower self-reported general health and an increased likelihood of suicide in adulthood.<sup>5,6</sup> In addition to direct harms to individuals, there is a burden of mental illness on families and communities, including societal and economic costs.<sup>7</sup> To reduce the immediate and long-term impacts associated with these conditions, understanding key risk factors and preventing mental health conditions at an earlier age is a priority for public health.

A key social determinant of health is food insecurity, which is the lack of access to food as a result of financial struggles. The prevalence of food insecurity in Canada is high, particularly among households with children.<sup>8</sup> It is estimated that 1 in 4, or 1.8 million, children under the age of 18 in Canada lived in food insecure households in 2021.<sup>9</sup> Food insecurity in Canada is linked to compromised diets in children,<sup>10</sup> which negatively impacts child growth and development.<sup>11</sup> Beyond diet, exposure to adverse childhood experiences can trigger stress responses, which impact brain development and increase the risk of poor mental health through adulthood.<sup>12</sup>

Despite the high prevalence of food insecurity among children in Canada, there is limited Canadian research on the impacts of food insecurity on the mental health of young children. In longitudinal research, food insecurity in early childhood has been linked to psychosocial problems, depression, and suicide in subsequent years.<sup>13,14</sup> A recent cross-sectional study showed greater mental health care use among children living in food insecure households in Ontario.<sup>15</sup> No previous Canadian research has used a population-representative sample of young children to examine the relationship between severities of household food insecurity and diagnosed mental health conditions, while controlling for key confounding factors such as parent mental health.

We drew on the latest national population health survey of Canadian children, the 2019 Canadian Health Survey of Children and Youth (CHSCY),<sup>16</sup> to examine the association between household food insecurity and parent/caregiver reports of health professional diagnosed mental health conditions in children between the ages of 5 to 11 years in Ontario, while controlling for key factors of socioeconomic and family wellbeing. Given the personal, economic and social burden of mental illness in Canada and its increase in children and youth since the COVID-pandemic,<sup>4</sup> it is crucial to understand early intervention points that could be targeted through public health policies to help mitigate future burdens.

## Methods

### *Study participants*

1  
2  
3 We examined children 5 to 11 years, from Ontario, Canada, whose parent or caregiver responded to the  
4 2019 CHSCY. The CHSCY is a national health survey run by Statistics Canada that represents 98% of  
5 Canada's children and youth aged 1 to 17 years as of January 31, 2019, who lived in private dwellings  
6 across 10 provinces and 3 territories.<sup>16</sup> The survey sampling frame excluded children living on First  
7 Nation reserves, other Indigenous settlements, foster homes, or children and youth who were  
8 institutionalized. Statistics Canada stratified the Ontario sample of CHSCY by sub-provincial geographic  
9 strata called Local Health Integration Networks, and by age group (1-4 years, 5-11 years, and 12-17  
10 years). Participants completed the survey predominantly online (70.0%) while 26.4% completed it by  
11 phone with an interviewer; the remaining 3.6% completed the survey in both modalities.<sup>17</sup> For children  
12 younger than 12 years, the person most knowledgeable (PMK) of the sampled child completed the  
13 survey. PMKs were the birth parent for 97% of participants. This paper refers to a child's PMK as their  
14 "parent/caregiver". Parents/caregivers reported on multiple measures of their child's health and well-  
15 being. The response rate for Ontario children 5 to 11 years was 57.4%. To ensure national  
16 representation of the population in the survey sample, Statistics Canada provides weighted and  
17 bootstrapping values to conduct analyses. A total of 10,164 Ontario children aged 5 to 11 participated in  
18 CHSCY. We excluded children from our study sample if they were missing any exposure or outcome data  
19 used in the study, leaving a final analytic sample of 10,026 children.

#### 24 *Exposure: Household food insecurity*

26 The main exposure was severity of household food insecurity, measured using the validated 18-question  
27 Household Food Security Survey Module (HFSSM).<sup>18</sup> Questions on the HFSSM measured a gradient of  
28 experiences related to food insecurity over the previous 12 months, from worrying about food running  
29 out to not eating for a whole day due to lack of money to buy more food.<sup>16</sup> We used established  
30 definitions to categorize children as food secure, marginally food insecure, moderately food insecure, or  
31 severely food insecure based on the number of affirmative answers on the HFSSM.<sup>19</sup> Food secure  
32 indicates no difficulty with income-related food access, marginally food insecure is defined as exactly  
33 one indication of difficulty with income-related food access (e.g., worried food would run out),  
34 moderately food insecure indicates compromise in the quality and/or the quantity of food consumed  
35 and lastly, severely food insecure indicates reduced food intake and disrupted eating patterns.<sup>19</sup> In  
36 sensitivity analyses we used a dichotomized exposure of food secure or food insecure (marginal,  
37 moderate, or severe).

#### 41 *Outcome: Diagnosed mental health conditions*

43 The main outcome of this study was parent/caregiver-report of a mental health condition that is  
44 expected to last or has already lasted 6 months or more and was diagnosed by a health professional.  
45 We categorized children as having any diagnosed mental health condition if their parent/caregiver  
46 responded affirmatively to at least one of four questions related to the following long-term conditions:  
47 (1) "An anxiety disorder, such as a phobia or obsessive-compulsive disorder or a panic disorder"; (2) "A  
48 mood disorder such as depression, bipolar disorder, mania or dysthymia"; (3) "Attention deficit disorder  
49 or attention deficit hyperactivity disorder, also known as ADD or ADHD; or (4) "Autism spectrum  
50 disorder, also known as autism, autistic disorder, Asperger's disorder or pervasive developmental  
51 disorder". We performed sensitivity analyses to assess the association of food insecurity and two groups  
52 of mental health diagnoses separately: autism spectrum disorder and ADHD, and anxiety and mood  
53 disorder.

### Covariates

We identified several potential confounding variables *a priori* in the existing literature based on their established association with household food insecurity or child health outcomes.<sup>8,13,20-25</sup> Covariates included sex at birth (male, female), age (years), highest parental educational attainment (high school or less, college/trades, bachelor's or more), household income adjusted for household size, parent/caregiver self-perceived mental health (excellent/very good, good, fair/poor), race and ethnic origin (White/non-racialized, Black, East Asian, Indigenous, Latin American, Other/Multiple, South Asian, Southeast Asian/Filipino, West Asian/Arab), immigration status (non-immigrant, immigrant/non-permanent resident), and parent divorce/separation (yes, no).

### Statistical Analysis

We calculated weighted prevalence of mental health conditions and socio-demographic characteristics across food security categories and performed Chi-squared tests for categorical variables and t-tests for continuous variables to assess statistically significant differences between covariate groups.

We created multivariable logistic regression models to estimate the association between food insecurity and mental health conditions, adjusting for age, sex, household income divided by the square root of the number of household members to adjust for household size,<sup>26</sup> highest level of parental educational attainment, parent self-perceived mental health, race or ethnic origin and Indigenous identity, child immigration status, and parent/caregiver divorce or separation.

To account for the complex survey design, in all analyses we used PROC SURVEY commands in SAS with bootstrap weights and bootstrap replications (n = 1000) provided by Statistics Canada. We assessed collinearity using variance inflation factors and none exceeded a value of 2, indicating no significant collinearity. We conducted sensitivity analyses consisting of separate models to analyze mood and anxiety disorders only, ADHD and ASD only, and with food security collapsed into two categories: food secure versus not food secure. We conducted all analyses using SAS Enterprise Guide (V8.2).

### Ethics Approval

This study was approved by the Ethics Review Board of Public Health Ontario.

## Results

The total sample of Ontario children between the ages of 5 to 11 years included in this study was 10,026. The prevalence of household food insecurity in our sample was 15.9%; 5.3% were marginally food insecure, 7.4% were moderately food insecure, and 3.2% were severely food insecure. The prevalence of any parent/caregiver-reported diagnosed mental health condition in our sample was 9.6% (7.4% reported a single condition, 2.2% reported two or more conditions); 2.5% had ASD, 6.2% had ADHD, 3.4% had anxiety or depression (Figure 1).

There were significant differences in most socio-demographic characteristics across food insecurity categories (Table 1). Children in households with higher levels of food insecurity tended to have lower household income, lower levels of parent education, more likely to be from a racialized group or identify as Indigenous, more likely to have a parent/caregiver with fair or poor mental health, and more likely to have experienced parent/caregiver divorce or separation. There were no significant differences in age,



1  
2  
3 sex, or child's immigration status. Children whose parents/caregivers had a bachelor's degree had lower  
4 food insecurity compared to those who reported having a high school diploma or a college/trades  
5 certificate. Parents/caregivers who reported excellent or very good mental health also had lower  
6 severity of household food insecurity (Table 1).  
7

8  
9 Figure 1 shows the prevalence of health professional diagnosed mental health conditions by household  
10 food insecurity status. The survey-weighted percentage of children aged 5 to 11 with a mental health  
11 diagnosis was 8.2% in food secure households, 12.9% in marginally, 14.7% in moderately and 26.1% in  
12 severely food insecure households.  
13

14 In the unadjusted model, household food insecurity was dose-dependently associated with increased  
15 odds of having a mental health condition (Table 2). After adjusting for confounding factors, a significant  
16 dose-dependent relationship remained for children living in moderately and severely food insecure  
17 households, who had a 1.54 (95% CI 1.07-2.20) and 2.15 (95% CI 1.36-3.38) higher risk of having any  
18 diagnosed mental health condition, respectively, compared to children living in food secure households  
19 (Table 2).  
20  
21

22 Sensitivity analysis where mood and anxiety disorders were analyzed separately showed a stronger  
23 association than both the primary analysis and the sensitivity analysis of ASD and ADHD analyzed  
24 separately, with children in severely food insecure households having 3.06 (95% CI, 1.59-5.91) higher  
25 odds of a diagnosed mood or anxiety disorder (Supplementary Table 1). Sensitivity analysis using two  
26 levels of food security, food secure and food insecure, showed associations similar to those between  
27 moderate household food insecurity and diagnosed mental health conditions (Supplementary Table 2).  
28  
29  
30

## 31 Discussion

32  
33 This study examined the association between household food insecurity and diagnosed mental health  
34 conditions among children 5 to 11 years using a provincially representative sample of children in  
35 Ontario. We found that children living in food insecure households were more likely to have a diagnosed  
36 mental health condition, including anxiety, mood disorders, ASD and ADHD, independent of  
37 sociodemographic and parent/caregiver characteristics. Household food insecurity was dose-  
38 dependently associated with a child's likelihood of having a diagnosed mental health condition, speaking  
39 to the importance of examining food insecurity by severity when possible. After adjusting for important  
40 confounders including income and parent/caregiver mental health, children in severely food insecure  
41 households were more than twice as likely to have a diagnosed mental health condition compared to  
42 children in food secure households.  
43  
44

45 Previous studies found increased odds of negative mental health outcomes among children and youth  
46 living in households experiencing food insecurity. Anderson et al. identified associations between food  
47 security and health care visits for a mental disorder among Canadian children aged 1-17.<sup>15</sup> This study  
48 showed increasing prevalence of mental health service use with increasing food insecurity severity,  
49 similar to our study. While some sensitivity analyses conducted by Anderson et al. were comparable to  
50 our analyses, our study identified stronger associations between food security and child mental health.  
51 One explanation may be limitations associated with using physician billing codes, such as miscoding the  
52 primary reason for the patient visit, particularly for outpatient visits, as well as not capturing other  
53 health professional identified diagnoses, such as those paid for through private insurance or out of  
54  
55  
56  
57  
58  
59  
60

1  
2  
3 pocket.<sup>27</sup> Other potential explanations may be our data are more recent, more representative of the  
4 broader population, or because of our narrower focus on children aged 5-11 years. Men et al. identified  
5 relationships between food security and mental health among Canadian youth aged 12-24.<sup>28</sup> Similar to  
6 our findings among children 5-11 years old, they showed a dose-response relationship between severity  
7 of food insecurity and mental health, where the odds of presence of diagnosed mental health conditions  
8 increased as the severity of household food insecurity increased among adolescents and adults.<sup>28</sup>  
9  
10

11 Household food insecurity can impact a child's mental health through a number of mechanisms.<sup>13</sup>  
12 Children from severely food insecure households face reduced quality, quantity, and frequency of meals  
13 which may directly impact behavioural difficulties and mental health conditions.<sup>29</sup> An indirect pathway  
14 may be through parental well-being where parents and caregivers experiencing food insecurity may  
15 reduce sensitive and responsive parenting from the chronic financial and emotional stress of acquiring  
16 food, which can negatively impact the child's overall mental health.<sup>29</sup> This suggests that even if children  
17 are not themselves experiencing disrupted eating or hunger, the uncertainty around food affordability  
18 and food availability in the family is enough to precipitate mental health conditions.  
19  
20

21 Our sensitivity analyses showed a stronger association between food insecurity and diagnosed mood  
22 and anxiety disorders, compared to the association with ASD and ADHD. This may be because of  
23 differing biological and psychosocial mechanisms underlying the associations between food insecurity  
24 and neurodevelopmental disorders compared to mood and anxiety disorders. There may also be  
25 temporal differences in exposure to food insecurity and the likelihood of developing a mood/anxiety  
26 disorder compared to a neurodevelopmental disorder. Macronutrient deficiencies affecting  
27 neurotransmitters and neuropsychiatric regulation in the early years may have effects on brain  
28 development and subsequent mental health problems.<sup>30</sup> Additionally, psychosocial and environmental  
29 effects including parental stress may contribute to the association between food insecurity and child  
30 mental health.<sup>30</sup>  
31  
32  
33

34 One major strength of this study was examining the dose-response relationship of food insecurity with  
35 parent/caregiver-reported diagnosed mental health conditions. Additionally, this is one of the few  
36 studies in the literature that analyzes mental health among young children between 5 to 11 years in  
37 Canada. The survey used for these analyses, CHSCY, is sampled and weighted to be representative of the  
38 child population in Canada. Additionally, food insecurity was captured using the HFSSM, which is well-  
39 validated as the primary measurement tool of food insecurity in Canada. Given the breadth of data  
40 collected in the CHSCY, we were also able to control for multiple sociodemographic, family, and  
41 economic factors in our analysis, including parent/caregiver mental health, which is an important  
42 confounder of the relationship between food security and child mental health.  
43  
44

45 Certain limitations should be considered when interpreting the results. The study used a cross-sectional  
46 design and is therefore unable to determine causality or to detangle the potential bidirectional  
47 relationship between food insecurity and child mental health. For instance, poor child mental health  
48 may worsen a family's food insecurity by depleting scarce financial and time resources. Additionally, the  
49 study relies on parental reports of both household food insecurity and health professional-diagnosed  
50 mental health conditions and is therefore at risk of information biases such as recall and social  
51 desirability biases. Further, parental reports have been shown to underestimate children's experience of  
52 food insecurity, compared to child reports.<sup>31</sup> To whatever degree this bias was present in our study, it  
53 would underestimate food insecurity and likely bias our results towards the null. It is also important to  
54  
55  
56  
57  
58  
59  
60

1  
2  
3 note some limitations of the CHSCY survey. Although the CHSCY data provides nationally representative  
4 data, the 2019 response rate to this survey cycle was only 57.4% for children 5 to 11 years and 51.8%  
5 overall.<sup>17</sup> This may introduce some selection bias in the population surveyed, although the impact on  
6 our findings, if any, is unclear given the correcting use of bootstrap weights and replicates, and existing  
7 evidence that response rates on health surveys is not related to nonresponse bias or data  
8 representativeness.<sup>32</sup>  
9  
10

## 11 Conclusion

12  
13  
14 This study found that Ontario children aged 5-11 who live in severely food insecure households are  
15 twice as likely to have been diagnosed with a mental health condition than children in food secure  
16 households. Compounded by the increases in child mental health conditions and rising food insecurity  
17 rates, both food insecurity and mental health are public health priorities. This study supports the need  
18 to implement policies that are focused on creating sustainable systems to alleviate the burden of food  
19 insecurity on mental health.  
20  
21  
22  
23  
24  
25  
26  
27  
28  
29  
30  
31  
32  
33  
34  
35  
36  
37  
38  
39  
40  
41  
42  
43  
44  
45  
46  
47  
48  
49  
50  
51  
52  
53  
54  
55  
56  
57  
58  
59  
60

## Tables and Figures

**Table 1: Characteristics of study population of children age 5-11, by food security status; Ontario, 2019**

| Characteristics                                             | Total  | Food secure | Marginally food insecure | Moderately food insecure | Severely food insecure | P-value for differences across groups |
|-------------------------------------------------------------|--------|-------------|--------------------------|--------------------------|------------------------|---------------------------------------|
| Age (Mean years)                                            | 8.0    | 8.0         | 7.8                      | 8.0                      | 8.0                    | 0.20                                  |
| Sex                                                         |        |             |                          |                          |                        | 0.33                                  |
| Female                                                      | 49.0   | 48.8        | 54.5                     | 48.5                     | 47.1                   |                                       |
| Male                                                        | 51.0   | 51.2        | 45.5                     | 51.5                     | 52.9                   |                                       |
| Household income adjusted for household size (Mean dollars) | 54,203 | 59,325      | 30,657                   | 26,462                   | 23,147                 |                                       |
| Highest parental education                                  |        |             |                          |                          |                        | <.0001                                |
| High school or less                                         | 13.9   | 11.6        | 22.8                     | 25.5                     | 32.8                   |                                       |
| College/Trades                                              | 36.2   | 34.2        | 45.9                     | 47.1                     | 48.9                   |                                       |
| Bachelor's or more                                          | 49.9   | 54.3        | 31.3                     | 27.5                     | 18.3                   |                                       |
| Race and ethnic origin                                      |        |             |                          |                          |                        | <.0001                                |
| Black                                                       | 7.3    | 5.7         | 11.1                     | 18.0                     | 18.8                   |                                       |
| East Asian                                                  | 5.9    | 6.5         | 3.0                      | 3.7                      | 0.6                    |                                       |
| Latin American                                              | 1.1    | 1.1         | 1.7                      | 0.9                      | 0.6                    |                                       |
| Other/Multiple                                              | 3.1    | 2.7         | 8.8                      | 3.6                      | 4.1                    |                                       |
| South Asian                                                 | 11.3   | 11.9        | 9.6                      | 9.3                      | 3.6                    |                                       |
| Southeast Asian/Filipino                                    | 4.1    | 4.0         | 4.6                      | 6.6                      | 2.0                    |                                       |
| Indigenous                                                  | 3.2    | 2.6         | 4.9                      | 4.6                      | 13.8                   |                                       |
| West Asian/Arab                                             | 3.6    | 3.4         | 5.6                      | 4.5                      | 3.0                    |                                       |
| White/non-racialized                                        | 60.2   | 62.1        | 50.7                     | 48.7                     | 53.6                   |                                       |
| Child immigration status                                    |        |             |                          |                          |                        | 0.30                                  |
| Immigrant/non-perm resident                                 | 9.5    | 9.5         | 11.5                     | 9.9                      | 5.7                    |                                       |
| Not immigrant/non-perm resident                             | 90.5   | 90.5        | 88.5                     | 90.1                     | 94.3                   |                                       |
| Experience parental separation                              |        |             |                          |                          |                        | <.0001                                |
| Experienced separation/divorce                              | 16.3   | 13.4        | 25.0                     | 29.4                     | 47.5                   |                                       |
| Never experienced separation/divorce                        | 83.7   | 86.6        | 75.0                     | 70.6                     | 52.5                   |                                       |
| PMK mental health                                           |        |             |                          |                          |                        | <.0001                                |
| Excellent/very good                                         | 71.0   | 74.0        | 64.8                     | 56.5                     | 38.0                   |                                       |
| Good                                                        | 23.0   | 21.5        | 25.9                     | 32.5                     | 36.3                   |                                       |
| Fair/poor                                                   | 5.9    | 4.5         | 9.3                      | 11.0                     | 25.7                   |                                       |

**Figure 1: Prevalence of diagnosed mental health conditions in children 5-11, by food security status; Ontario, 2019**

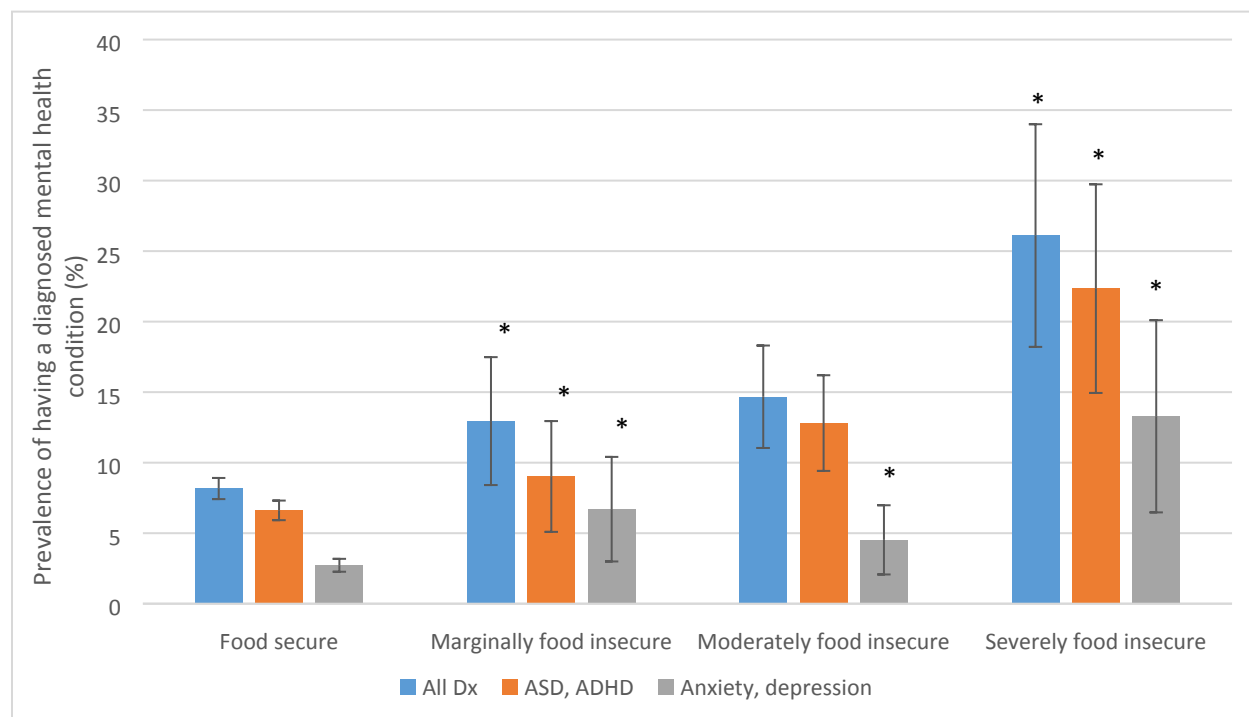

Dx = Diagnosis, ASD = Autism Spectrum Disorder, ADHD = Attention Deficit Hyperactivity Disorder

\*Interpret estimate with caution due to a Coefficient of Variation greater than 15%

**Table 2: Unadjusted and adjusted logistic regression models of the association between household food insecurity status and any diagnosed mental health condition**

| Variable                                                   | Unadjusted OR (95% CI) | Adjusted OR (95% CI) |
|------------------------------------------------------------|------------------------|----------------------|
| <b>Household Food Security</b>                             |                        |                      |
| Food Secure                                                | REF                    | REF                  |
| Marginally Food Insecure                                   | 1.67 (1.09, 2.57)      | 1.57 (0.97, 2.55)    |
| Moderately Food Insecure                                   | 1.93 (1.42, 2.63)      | 1.54 (1.07, 2.20)    |
| Severely Food Insecure                                     | 3.97 (2.60, 6.07)      | 2.15 (1.36, 3.38)    |
| Age (years)                                                | 1.23 (1.17, 1.29)      | 1.24 (1.18, 1.30)    |
| <b>Sex</b>                                                 |                        |                      |
| Female                                                     | REF                    | REF                  |
| Male                                                       | 2.29 (1.87, 2.81)      | 2.44 (1.99, 3.00)    |
| Household Income (adjusted for household size, per \$5000) | 0.97 (0.95, 0.99)      | 0.99 (0.97, 1.01)    |
| <b>Highest Level Parent Education</b>                      |                        |                      |
| High school or less                                        | REF                    | REF                  |
| College/Trades                                             | 1.03 (0.78, 1.37)      | 1.18 (0.88, 1.59)    |
| University or more                                         | 0.64 (0.48, 0.86)      | 1.07 (0.78, 1.45)    |
| <b>Parent's Mental Health Status</b>                       |                        |                      |
| Excellent/Very good                                        | REF                    | REF                  |
| Good                                                       | 2.31 (1.88, 2.84)      | 1.91 (1.53, 2.40)    |
| Fair/Poor                                                  | 4.43 (3.31, 5.95)      | 3.41 (2.47, 4.71)    |
| <b>Race and ethnic origin</b>                              |                        |                      |
| White/non-racialized                                       | REF                    | REF                  |
| Black                                                      | 1.05 (0.69, 1.59)      | 0.90 (0.55, 1.45)    |
| East Asian                                                 | 0.46 (0.27, 0.79)      | 0.57 (0.33, 0.98)    |
| Indigenous                                                 | 2.23 (1.52, 3.28)      | 1.63 (1.07, 2.48)    |
| Latin American                                             | 0.72 (0.27, 1.95)      | 0.80 (0.30, 2.13)    |
| Other/Multiple                                             | 0.61 (0.32, 1.13)      | 0.54 (0.28, 1.04)    |
| South Asian                                                | 0.30 (0.19, 0.48)      | 0.42 (0.26, 0.68)    |
| Southeast Asian/Filipino                                   | 0.30 (0.15, 0.59)      | 0.36 (0.17, 0.75)    |
| West Asian/Arab                                            | 0.40 (0.17, 0.91)      | 0.49 (0.22, 1.11)    |
| <b>Immigration Status</b>                                  |                        |                      |
| Non-immigrant                                              | REF                    | REF                  |
| Immigrant/non-permanent resident                           | 0.41 (0.27, 0.65)      | 0.71 (0.44, 1.12)    |
| <b>Divorce/Separation</b>                                  |                        |                      |
| No                                                         | REF                    | REF                  |
| Yes                                                        | 2.46 (1.98, 3.06)      | 1.55 (1.21, 1.98)    |

## References

1. MHASEF Research Team. The Mental Health of Children and Youth in Ontario: 2017 Scorecard. Toronto, ON; 2017. Available from: <https://www.ices.on.ca/publications/research-reports/the-mental-health-of-children-and-youth-in-ontario-2017-scorecard/>
2. Comeau J, Georgiades K, Duncan LA-O, Wang L, Boyle MH. Changes in the Prevalence of Child and Youth Mental Disorders and Perceived Need for Professional Help between 1983 and 2014: Evidence from the Ontario Child Health Study. (1497-0015 (Electronic)). Available from:
3. Wiens K, Bhattarai A, Pedram P, Dores A, Williams J, Bulloch A, et al. A growing need for youth mental health services in Canada: examining trends in youth mental health from 2011 to 2018. *Epidemiology and psychiatric sciences*. 2020;29:e115. Available from: <https://doi.org/10.1017/S2045796020000281>
4. Madigan S, Racine N, Vaillancourt T, Korczak DJ, Hewitt JMA, Pador P, et al. Changes in Depression and Anxiety Among Children and Adolescents From Before to During the COVID-19 Pandemic: A Systematic Review and Meta-analysis. *JAMA Pediatrics*. 2023;177(6):567-81. Available from: <https://doi.org/10.1001/jamapediatrics.2023.0846>
5. Johnson D, Dupuis G, Piche J, Clayborne Z, Colman I. Adult mental health outcomes of adolescent depression: A systematic review. *Depression and Anxiety*. 2018;35(8):700-16. Available from: <https://doi.org/https://doi.org/10.1002/da.22777>
6. Kessler RC, Avenevoli S, Costello EJ, Georgiades K, Green JG, Gruber MJ, et al. Prevalence, Persistence, and Sociodemographic Correlates of DSM-IV Disorders in the National Comorbidity Survey Replication Adolescent Supplement. *Archives of General Psychiatry*. 2012;69(4):372-80. Available from: <https://doi.org/10.1001/archgenpsychiatry.2011.160>
7. Ahmad S, Briante C, Khan M, Smetanin P, Stiff D. The life and economic impact of major mental illnesses in Canada. Ottawa, Ontario: Canadian Electronic Library; 2015.
8. Tarasuk V LT, Fafard St-Germain AA. Household food insecurity in Canada, 2021. . Toronto: Research to identify policy options to reduce food insecurity (PROOF). ; 2022
9. Statistics Canada. Table 13-10-0835-01 Food insecurity by selected demographic characteristics. Ottawa, ON; 2023. Available from: <https://www150.statcan.gc.ca/t1/tbl1/en/tv.action?pid=1310083501>
10. Hutchinson J, Tarasuk V. The relationship between diet quality and the severity of household food insecurity in Canada. *Public Health Nutrition*. 2021;25(4):1013-26. Available from: <https://doi.org/10.1017/S1368980021004031>
11. Owen L, Corfe B. The role of diet and nutrition on mental health and wellbeing. *Proceedings of the Nutrition Society*. 2017;76(4):425-6. Available from: <https://doi.org/10.1017/S0029665117001057>
12. Merrick MT, Ports KA, Ford DC, Afifi TO, Gershoff ET, Grogan-Kaylor A. Unpacking the impact of adverse childhood experiences on adult mental health. *Child Abuse & Neglect*. 2017;69:10-9. Available from: <https://doi.org/https://doi.org/10.1016/j.chiabu.2017.03.016>
13. Melchior M, Chastang J-F, Falissard B, Galéra C, Tremblay RE, Côté SM, et al. Food Insecurity and Children's Mental Health: A Prospective Birth Cohort Study. *PLOS ONE*. 2012;7(12):e52615. Available from: <https://doi.org/10.1371/journal.pone.0052615>

- 1  
2  
3 14. Paquin V, Muckle G, Bolanis D, Courtemanche Y, Castellanos-Ryan N, Boivin M, et al.  
4 Longitudinal Trajectories of Food Insecurity in Childhood and Their Associations With Mental  
5 Health and Functioning in Adolescence. *JAMA Network Open*. 2021;4(12):e2140085-e. Available  
6 from: <https://doi.org/10.1001/jamanetworkopen.2021.40085>  
7
- 8 15. Anderson KK, Clemens KK, Le B, Zhang L, Comeau J, Tarasuk V, et al. Household food insecurity  
9 and health service use for mental and substance use disorders among children and adolescents  
10 in Ontario, Canada. *Canadian Medical Association Journal*. 2023;195(28):E948-E55. Available  
11 from: <https://doi.org/10.1503/cmaj.230332>  
12
- 13 16. Statistics Canada. Canadian Health Survey on Children and Youth (CHSCY). [updated February  
14 11, 2019; cited 2022 June 14]. Available from:  
15 <https://www23.statcan.gc.ca/imdb/p2SV.pl?Function=getSurvey&SDDS=5233>  
16
- 17 17. Statistics Canada. 2019 Canadian Health Survey on Children and Youth (CHSCY): User Guide;  
18 2020  
19
- 20 18. Government of Canada. The Household Food Security Survey Module (HFSSM). [updated 2012-  
21 07-25; cited 2023 March 10]. Available from: [https://www.canada.ca/en/health-  
22 canada/services/food-nutrition/food-nutrition-surveillance/health-nutrition-surveys/canadian-  
23 community-health-survey-cchs/household-food-insecurity-canada-overview/household-food-  
24 security-survey-module-hfssm-health-nutrition-surveys-health-canada.html](https://www.canada.ca/en/health-canada/services/food-nutrition/food-nutrition-surveillance/health-nutrition-surveys/canadian-community-health-survey-cchs/household-food-insecurity-canada-overview/household-food-security-survey-module-hfssm-health-nutrition-surveys-health-canada.html)  
25
- 26 19. Government of Canada. Determining food security status. 2020 [updated 2020-02-18]. Available  
27 from: [https://www.canada.ca/en/health-canada/services/food-nutrition/food-nutrition-  
28 surveillance/health-nutrition-surveys/canadian-community-health-survey-cchs/household-food-  
29 insecurity-canada-overview/determining-food-security-status-food-nutrition-surveillance-  
30 health-canada.html](https://www.canada.ca/en/health-canada/services/food-nutrition/food-nutrition-surveillance/health-nutrition-surveys/canadian-community-health-survey-cchs/household-food-insecurity-canada-overview/determining-food-security-status-food-nutrition-surveillance-health-canada.html)  
31
- 32 20. Fernández CR, Yomogida M, Aratani Y, Hernández D. Dual Food and Energy Hardship and  
33 Associated Child Behavior Problems. *Academic pediatrics*. 2018;18(8):889-96. Available from:  
34 <https://doi.org/10.1016/j.acap.2018.07.002>  
35
- 36 21. Liu R, Urquia ML, Tarasuk V. The prevalence and predictors of household food insecurity among  
37 adolescents in Canada. *Canadian Journal of Public Health*. 2023;114(3):453-63. Available from:  
38 <https://doi.org/10.17269/s41997-022-00737-2>  
39
- 40 22. McIntyre L, Wu X, Kwok C, Patten SB. The pervasive effect of youth self-report of hunger on  
41 depression over 6 years of follow up. *Social psychiatry and psychiatric epidemiology*.  
42 2017;52(5):537-47. Available from: <https://doi.org/10.1007/s00127-017-1361-5>  
43
- 44 23. McLaughlin KA, Green JG, Alegría M, Jane Costello E, Gruber MJ, Sampson NA, et al. Food  
45 Insecurity and Mental Disorders in a National Sample of U.S. Adolescents. *Journal of the  
46 American Academy of Child & Adolescent Psychiatry*. 2012;51(12):1293-303. Available from:  
47 <https://doi.org/https://doi.org/10.1016/j.jaac.2012.09.009>  
48
- 49 24. PROOF. Food Insecurity and Mental Health. [updated February 22, 2018; cited 2023 March 10].  
50 Available from: <https://proof.utoronto.ca/resource/food-insecurity-and-mental-health/>  
51
- 52 25. Tarasuk V, Fafard St-Germain A-A, Mitchell A. Geographic and socio-demographic predictors of  
53 household food insecurity in Canada, 2011–12. *BMC Public Health*. 2019;19(1):12. Available  
54 from: <https://doi.org/10.1186/s12889-018-6344-2>  
55  
56  
57  
58  
59  
60



- 1  
2  
3 26. Statistics Canada. Adjusted total income of private household. 2016 [updated 2019-04-03; cited  
4 2023 July 27]. Available from:  
5 <https://www23.statcan.gc.ca/imdb/p3Var.pl?Function=DEC&Id=252278>  
6
- 7 27. MHASEF Research Team. The Mental Health of Children and Youth in Ontario: 2017 Scorecard.  
8 Technical Appendix. . Toronto, ON: Institute for Clinical Evaluative Sciences; 2017. Available  
9 from: [https://www.ices.on.ca/publications/research-reports/the-mental-health-of-children-and-](https://www.ices.on.ca/publications/research-reports/the-mental-health-of-children-and-youth-in-ontario-2017-scorecard/)  
10 [youth-in-ontario-2017-scorecard/](https://www.ices.on.ca/publications/research-reports/the-mental-health-of-children-and-youth-in-ontario-2017-scorecard/)  
11
- 12 28. Men F, Elgar FJ, Tarasuk V. Food insecurity is associated with mental health problems among  
13 Canadian youth. *Journal of Epidemiology and Community Health*. 2021;75(8):741-8. Available  
14 from: <https://doi.org/10.1136/jech-2020-216149>  
15
- 16 29. Ashiabi GS, O'Neal KK. A Framework for Understanding the Association Between Food Insecurity  
17 and Children's Developmental Outcomes. *Child development perspectives*. 2008;2(2):71-7.  
18 Available from: <https://doi.org/10.1111/j.1750-8606.2008.00049.x>  
19
- 20 30. Cain KS, Meyer SC, Cummer E, Patel KK, Casacchia NJ, Montez K, et al. Association of Food  
21 Insecurity with Mental Health Outcomes in Parents and Children. *Academic pediatrics*.  
22 2022;22(7):1105-14. Available from: <https://doi.org/https://doi.org/10.1016/j.acap.2022.04.010>  
23
- 24 31. Bernard R, Hammarlund R, Bouquet M, Ojewole T, Kirby D, Grizzaffi J, et al. Parent and Child  
25 Reports of Food Insecurity and Mental Health: Divergent Perspectives. *Ochsner Journal*.  
26 2018;18(4):318-25. Available from: <https://doi.org/10.31486/toj.18.0037>  
27
- 28 32. Lee S, Brown ER, Grant D, Belin TR, Brick JM. Exploring Nonresponse Bias in a Health Survey  
29 Using Neighborhood Characteristics. *American Journal of Public Health*. 2009;99(10):1811-7.  
30 Available from: <https://doi.org/10.2105/ajph.2008.154161>  
31  
32  
33  
34  
35  
36  
37  
38  
39  
40  
41  
42  
43  
44  
45  
46  
47  
48  
49  
50  
51  
52  
53  
54  
55  
56  
57  
58  
59  
60

**Supplementary Table 1a: Unadjusted and adjusted logistic regression models of the association between household food insecurity status and a diagnosed mood or anxiety disorder**

| Variable                                                   | Unadjusted OR (95% CI) | Adjusted OR (95% CI) |
|------------------------------------------------------------|------------------------|----------------------|
| <b>Household Food Security</b>                             |                        |                      |
| Food Secure                                                | REF                    | REF                  |
| Marginally Food Insecure                                   | 2.57 (1.31, 5.02)      | 2.46 (1.15, 5.23)    |
| Moderately Food Insecure                                   | 1.69 (0.91, 3.16)      | 1.38 (0.71, 2.70)    |
| Severely Food Insecure                                     | 5.47 (2.87, 10.4)      | 3.06 (1.59, 5.91)    |
| Age (years)                                                | 1.31 (1.21, 1.43)      | 1.32 (1.22, 1.44)    |
| <b>Sex</b>                                                 |                        |                      |
| Female                                                     | REF                    | REF                  |
| Male                                                       | 1.15 (0.83, 1.59)      | 1.16 (0.83, 1.61)    |
| Household Income (adjusted for household size, per \$5000) | 0.98 (0.94, 1.02)      | 1.00 (0.96, 1.03)    |
| <b>Highest Level Parent Education</b>                      |                        |                      |
| High school or less                                        | REF                    | REF                  |
| College/Trades                                             | 1.01 (0.61, 1.70)      | 1.21 (0.69, 2.11)    |
| University or more                                         | 0.71 (0.42, 1.21)      | 1.49 (0.82, 2.71)    |
| <b>Parent's Mental Health Status</b>                       |                        |                      |
| Excellent/Very good                                        | REF                    | REF                  |
| Good                                                       | 2.97 (2.06, 4.28)      | 2.25 (1.50, 3.37)    |
| Fair/Poor                                                  | 6.19 (3.77, 10.2)      | 4.03 (2.41, 6.76)    |
| <b>Race and ethnic origin</b>                              |                        |                      |
| White/non-racialized                                       | REF                    | REF                  |
| Black                                                      | 0.45 (0.14, 1.41)      | 0.33 (0.10, 1.13)    |
| East Asian                                                 | 0.28 (0.10, 0.81)      | 0.35 (0.12, 1.02)    |
| Indigenous                                                 | 2.32 (1.25, 4.31)      | 1.59 (0.83, 3.03)    |
| Latin American                                             | 0.54 (0.06, 5.01)      | 0.57 (0.06, 5.43)    |
| Other/Multiple                                             | 0.43 (0.04, 4.86)      | 0.40 (0.03, 4.62)    |
| South Asian                                                | 0.10 (0.02, 0.57)      | 0.13 (0.02, 0.81)    |
| Southeast Asian/Filipino                                   | 0.33 (0.05, 2.02)      | 0.42 (0.06, 2.72)    |
| West Asian/Arab                                            | 0.31 (0.04, 2.14)      | 0.42 (0.06, 2.87)    |
| <b>Immigration Status</b>                                  |                        |                      |
| Non-immigrant                                              | REF                    | REF                  |
| Immigrant/non-permanent resident                           | 0.35 (0.18, 0.69)      | 0.87 (0.43, 1.76)    |
| <b>Divorce/Separation</b>                                  |                        |                      |
| No                                                         | REF                    | REF                  |
| Yes                                                        | 3.28 (2.31, 4.66)      | 2.02 (1.34, 3.05)    |

**Supplementary Table 1b: Unadjusted and adjusted logistic regression models of the association between household food insecurity status and diagnosed autism spectrum disorder or attention deficit hyperactivity disorder**

| Variable                                                   | Unadjusted OR (95% CI) | Adjusted OR (95% CI) |
|------------------------------------------------------------|------------------------|----------------------|
| <b>Household Food Security</b>                             |                        |                      |
| Food Secure                                                | REF                    | REF                  |
| Marginally Food Insecure                                   | 1.40 (0.84, 2.33)      | 1.25 (0.71, 2.20)    |
| Moderately Food Insecure                                   | 2.07 (1.49, 2.88)      | 1.57 (1.07, 2.29)    |
| Severely Food Insecure                                     | 4.06 (2.61, 6.32)      | 2.06 (1.26, 3.37)    |
| Age (years)                                                | 1.19 (1.14, 1.26)      | 1.21 (1.15, 1.27)    |
| <b>Sex</b>                                                 |                        |                      |
| Female                                                     | REF                    | REF                  |
| Male                                                       | 3.31 (2.60, 4.22)      | 3.56 (2.80, 4.54)    |
| Household Income (adjusted for household size, per \$5000) | 0.95 (0.93, 0.98)      | 0.97 (0.95, 1.00)    |
| <b>Highest Level Parent Education</b>                      |                        |                      |
| High school or less                                        | REF                    | REF                  |
| College/Trades                                             | 0.97 (0.72, 1.32)      | 1.10 (0.80, 1.52)    |
| University or more                                         | 0.56 (0.41, 0.77)      | 0.95 (0.66, 1.35)    |
| <b>Parent's Mental Health Status</b>                       |                        |                      |
| Excellent/Very good                                        | REF                    | REF                  |
| Good                                                       | 2.13 (1.69, 2.67)      | 1.75 (1.36, 2.26)    |
| Fair/Poor                                                  | 4.39 (3.20, 6.03)      | 3.41 (2.41, 4.83)    |
| <b>Race and ethnic origin</b>                              |                        |                      |
| White/non-racialized                                       | REF                    | REF                  |
| Black                                                      | 1.17 (0.76, 1.78)      | 0.98 (0.60, 1.60)    |
| East Asian                                                 | 0.46 (0.25, 0.84)      | 0.57 (0.31, 1.06)    |
| Indigenous                                                 | 1.96 (1.29, 2.99)      | 1.37 (0.86, 2.19)    |
| Latin American                                             | 0.62 (0.15, 2.57)      | 0.72 (0.18, 2.91)    |
| Other/Multiple                                             | 0.60 (0.31, 1.16)      | 0.50 (0.26, 0.99)    |
| South Asian                                                | 0.34 (0.21, 0.54)      | 0.47 (0.28, 0.79)    |
| Southeast Asian/Filipino                                   | 0.25 (0.13, 0.48)      | 0.29 (0.15, 0.59)    |
| West Asian/Arab                                            | 0.40 (0.15, 1.02)      | 0.46 (0.18, 1.17)    |
| <b>Immigration Status</b>                                  |                        |                      |
| Non-immigrant                                              | REF                    | REF                  |
| Immigrant/non-permanent resident                           | 0.39 (0.23, 0.66)      | 0.63 (0.37, 1.08)    |
| <b>Divorce/Separation</b>                                  |                        |                      |
| No                                                         | REF                    | REF                  |
| Yes                                                        | 2.35 (1.86, 2.97)      | 1.43 (1.09, 1.86)    |

**Supplementary Table 2: Unadjusted and adjusted logistic regression models of the association between household food insecurity and any diagnosed mental health condition**

| Variable                                                          | Unadjusted OR (95% CI) | Adjusted OR (95% CI) |
|-------------------------------------------------------------------|------------------------|----------------------|
| <b>Household Food Security</b>                                    |                        |                      |
| Food Secure                                                       | REF                    | REF                  |
| Food Insecure (marginal, moderate, or severe)                     | 2.70 (1.81, 4.01)      | 1.68 (1.28, 2.21)    |
| <b>Age (years)</b>                                                | 1.31 (1.21, 1.43)      | 1.24 (1.18, 1.30)    |
| <b>Sex</b>                                                        |                        |                      |
| Female                                                            | REF                    | REF                  |
| Male                                                              | 2.29 (1.87, 2.81)      | 2.45 (1.99, 3.02)    |
| <b>Household Income (adjusted for household size, per \$5000)</b> | 0.97 (0.95, 0.99)      | 0.99 (0.97, 1.01)    |
| <b>Highest Level Parent Education</b>                             |                        |                      |
| High school or less                                               | REF                    | REF                  |
| College/Trades                                                    | 1.03 (0.78, 1.37)      | 1.17 (0.87, 1.58)    |
| University or more                                                | 0.64 (0.48, 0.86)      | 1.06 (0.78, 1.44)    |
| <b>Parent's Mental Health Status</b>                              |                        |                      |
| Excellent/Very good                                               | REF                    | REF                  |
| Good                                                              | 2.31 (1.88, 2.84)      | 1.92 (1.53, 2.41)    |
| Fair/Poor                                                         | 4.43 (3.31, 5.95)      | 3.49 (2.52, 4.83)    |
| <b>Race and ethnic origin</b>                                     |                        |                      |
| White/non-racialized                                              | REF                    | REF                  |
| Black                                                             | 1.05 (0.69, 1.59)      | 0.90 (0.55, 1.45)    |
| East Asian                                                        | 0.46 (0.27, 0.79)      | 0.56 (0.32, 0.98)    |
| Indigenous                                                        | 2.23 (1.52, 3.28)      | 1.66 (1.09, 2.52)    |
| Latin American                                                    | 0.72 (0.27, 1.95)      | 0.79 (0.30, 2.10)    |
| Other/Multiple                                                    | 0.61 (0.32, 1.13)      | 0.53 (0.27, 1.03)    |
| South Asian                                                       | 0.30 (0.19, 0.48)      | 0.42 (0.26, 0.68)    |
| Southeast Asian/Filipino                                          | 0.30 (0.15, 0.59)      | 0.36 (0.17, 0.74)    |
| West Asian/Arab                                                   | 0.40 (0.17, 0.91)      | 0.49 (0.22, 1.11)    |
| <b>Immigration Status</b>                                         |                        |                      |
| Non-immigrant                                                     | REF                    | REF                  |
| Immigrant/non-permanent resident                                  | 0.41 (0.27, 0.65)      | 0.71 (0.45, 1.12)    |
| <b>Divorce/Separation</b>                                         |                        |                      |
| No                                                                | REF                    | REF                  |
| Yes                                                               | 2.46 (1.98, 3.06)      | 1.56 (1.22, 2.00)    |

STROBE Statement—Checklist of items that should be included in reports of *cross-sectional studies*

|                              | Item No | Recommendation                                                                                                                                                                                               | Page No |
|------------------------------|---------|--------------------------------------------------------------------------------------------------------------------------------------------------------------------------------------------------------------|---------|
| <b>Title and abstract</b>    | 1       | (a) Indicate the study's design with a commonly used term in the title or the abstract                                                                                                                       | 1       |
|                              |         | (b) Provide in the abstract an informative and balanced summary of what was done and what was found                                                                                                          | 2       |
| <b>Introduction</b>          |         |                                                                                                                                                                                                              |         |
| Background/rationale         | 2       | Explain the scientific background and rationale for the investigation being reported                                                                                                                         | 3       |
| Objectives                   | 3       | State specific objectives, including any prespecified hypotheses                                                                                                                                             | 3       |
| <b>Methods</b>               |         |                                                                                                                                                                                                              |         |
| Study design                 | 4       | Present key elements of study design early in the paper                                                                                                                                                      | 4       |
| Setting                      | 5       | Describe the setting, locations, and relevant dates, including periods of recruitment, exposure, follow-up, and data collection                                                                              | 4       |
| Participants                 | 6       | (a) Give the eligibility criteria, and the sources and methods of selection of participants                                                                                                                  | 4       |
| Variables                    | 7       | Clearly define all outcomes, exposures, predictors, potential confounders, and effect modifiers. Give diagnostic criteria, if applicable                                                                     | 4,5     |
| Data sources/<br>measurement | 8*      | For each variable of interest, give sources of data and details of methods of assessment (measurement). Describe comparability of assessment methods if there is more than one group                         | 4       |
| Bias                         | 9       | Describe any efforts to address potential sources of bias                                                                                                                                                    | 5       |
| Study size                   | 10      | Explain how the study size was arrived at                                                                                                                                                                    | 4       |
| Quantitative variables       | 11      | Explain how quantitative variables were handled in the analyses. If applicable, describe which groupings were chosen and why                                                                                 | 4,5     |
| Statistical methods          | 12      | (a) Describe all statistical methods, including those used to control for confounding                                                                                                                        | 5       |
|                              |         | (b) Describe any methods used to examine subgroups and interactions                                                                                                                                          | N/A     |
|                              |         | (c) Explain how missing data were addressed                                                                                                                                                                  | 4       |
|                              |         | (d) If applicable, describe analytical methods taking account of sampling strategy                                                                                                                           | 5       |
|                              |         | (e) Describe any sensitivity analyses                                                                                                                                                                        | 5       |
| <b>Results</b>               |         |                                                                                                                                                                                                              |         |
| Participants                 | 13*     | (a) Report numbers of individuals at each stage of study—eg numbers potentially eligible, examined for eligibility, confirmed eligible, included in the study, completing follow-up, and analysed            | 4       |
|                              |         | (b) Give reasons for non-participation at each stage                                                                                                                                                         | 4       |
|                              |         | (c) Consider use of a flow diagram                                                                                                                                                                           | N/A     |
| Descriptive data             | 14*     | (a) Give characteristics of study participants (eg demographic, clinical, social) and information on exposures and potential confounders                                                                     | 5,9     |
|                              |         | (b) Indicate number of participants with missing data for each variable of interest                                                                                                                          | N/A     |
| Outcome data                 | 15*     | Report numbers of outcome events or summary measures                                                                                                                                                         | 10      |
| Main results                 | 16      | (a) Give unadjusted estimates and, if applicable, confounder-adjusted estimates and their precision (eg, 95% confidence interval). Make clear which confounders were adjusted for and why they were included | 11      |

|                          |    |                                                                                                                                                                            |     |
|--------------------------|----|----------------------------------------------------------------------------------------------------------------------------------------------------------------------------|-----|
|                          |    | (b) Report category boundaries when continuous variables were categorized                                                                                                  | N/A |
|                          |    | (c) If relevant, consider translating estimates of relative risk into absolute risk for a meaningful time period                                                           | N/A |
| Other analyses           | 17 | Report other analyses done—eg analyses of subgroups and interactions, and sensitivity analyses                                                                             | 6   |
| <b>Discussion</b>        |    |                                                                                                                                                                            |     |
| Key results              | 18 | Summarise key results with reference to study objectives                                                                                                                   | 6   |
| Limitations              | 19 | Discuss limitations of the study, taking into account sources of potential bias or imprecision. Discuss both direction and magnitude of any potential bias                 | 7   |
| Interpretation           | 20 | Give a cautious overall interpretation of results considering objectives, limitations, multiplicity of analyses, results from similar studies, and other relevant evidence | 6-8 |
| Generalisability         | 21 | Discuss the generalisability (external validity) of the study results                                                                                                      | 7,8 |
| <b>Other information</b> |    |                                                                                                                                                                            |     |
| Funding                  | 22 | Give the source of funding and the role of the funders for the present study and, if applicable, for the original study on which the present article is based              | 1   |

\*Give information separately for exposed and unexposed groups.

**Note:** An Explanation and Elaboration article discusses each checklist item and gives methodological background and published examples of transparent reporting. The STROBE checklist is best used in conjunction with this article (freely available on the Web sites of PLoS Medicine at <http://www.plosmedicine.org/>, Annals of Internal Medicine at <http://www.annals.org/>, and Epidemiology at <http://www.epidem.com/>). Information on the STROBE Initiative is available at [www.strobe-statement.org](http://www.strobe-statement.org).

# BMJ Open

## A cross-sectional analysis of the association between household food insecurity and mental health conditions in children aged 5 to 11 years in Canada

|                                 |                                                                                                                                                                                                                                                                                                                                                                                                                                                                                                |
|---------------------------------|------------------------------------------------------------------------------------------------------------------------------------------------------------------------------------------------------------------------------------------------------------------------------------------------------------------------------------------------------------------------------------------------------------------------------------------------------------------------------------------------|
| Journal:                        | <i>BMJ Open</i>                                                                                                                                                                                                                                                                                                                                                                                                                                                                                |
| Manuscript ID                   | bmjopen-2023-081538.R1                                                                                                                                                                                                                                                                                                                                                                                                                                                                         |
| Article Type:                   | Original research                                                                                                                                                                                                                                                                                                                                                                                                                                                                              |
| Date Submitted by the Author:   | 12-Apr-2024                                                                                                                                                                                                                                                                                                                                                                                                                                                                                    |
| Complete List of Authors:       | Thielman, Justin; Public Health Ontario, Health Promotion, Chronic Disease & Injury Prevention<br>Orr, Sarah; Public Health Ontario, Health Promotion, Chronic, Disease and Injury Prevention<br>Naraentheraraja, Saranya; University of Toronto, Dalla Lana School of Public Health<br>Harrington, Daniel; Public Health Ontario, Health Promotion, Chronic Disease and Injury Prevention<br>Carsley, Sarah; Public Health Ontario; University of Toronto, Dalla Lana School of Public Health |
| <b>Primary Subject Heading</b>: | Mental health                                                                                                                                                                                                                                                                                                                                                                                                                                                                                  |
| Secondary Subject Heading:      | Nutrition and metabolism, Epidemiology, Paediatrics, Public health                                                                                                                                                                                                                                                                                                                                                                                                                             |
| Keywords:                       | MENTAL HEALTH, EPIDEMIOLOGY, NUTRITION & DIETETICS, PAEDIATRICS, PUBLIC HEALTH, Food Insecurity                                                                                                                                                                                                                                                                                                                                                                                                |
|                                 |                                                                                                                                                                                                                                                                                                                                                                                                                                                                                                |

SCHOLARONE™  
Manuscripts



I, the Submitting Author has the right to grant and does grant on behalf of all authors of the Work (as defined in the below author licence), an exclusive licence and/or a non-exclusive licence for contributions from authors who are: i) UK Crown employees; ii) where BMJ has agreed a CC-BY licence shall apply, and/or iii) in accordance with the terms applicable for US Federal Government officers or employees acting as part of their official duties; on a worldwide, perpetual, irrevocable, royalty-free basis to BMJ Publishing Group Ltd ("BMJ") its licensees and where the relevant Journal is co-owned by BMJ to the co-owners of the Journal, to publish the Work in this journal and any other BMJ products and to exploit all rights, as set out in our [licence](#).

The Submitting Author accepts and understands that any supply made under these terms is made by BMJ to the Submitting Author unless you are acting as an employee on behalf of your employer or a postgraduate student of an affiliated institution which is paying any applicable article publishing charge ("APC") for Open Access articles. Where the Submitting Author wishes to make the Work available on an Open Access basis (and intends to pay the relevant APC), the terms of reuse of such Open Access shall be governed by a Creative Commons licence – details of these licences and which [Creative Commons](#) licence will apply to this Work are set out in our licence referred to above.

Other than as permitted in any relevant BMJ Author's Self Archiving Policies, I confirm this Work has not been accepted for publication elsewhere, is not being considered for publication elsewhere and does not duplicate material already published. I confirm all authors consent to publication of this Work and authorise the granting of this licence.



1  
2  
3 **A cross-sectional analysis of the association between household food insecurity and mental health**  
4 **conditions in children aged 5 to 11 years in Canada**  
5

6 Justin Thielman MSc,<sup>1</sup> Sarah Orr PhD,<sup>1</sup> Saranya Naraentheraraja MMASc MPH,<sup>2</sup> Daniel W. Harrington  
7 PhD,<sup>1</sup> Sarah Carsley PhD<sup>1,2</sup>  
8

9 **Affiliations**  
10

- 11 1. Department of Health Promotion, Chronic, Disease and Injury Prevention, Public Health Ontario,  
12 Toronto, Canada
- 13
- 14 2. Dalla Lana School of Public Health, University of Toronto, Toronto, Canada  
15

16 **Corresponding Author**

17 Sarah Carsley  
18 661 University Avenue, Suite 1701  
19 Toronto, ON  
20 M5G 1M1  
21 [Sarah.carsley@oahpp.ca](mailto:Sarah.carsley@oahpp.ca)  
22  
23

24  
25 Keywords: food insecurity, mental health, children, public health, epidemiology  
26  
27  
28  
29  
30  
31  
32  
33  
34  
35  
36  
37  
38  
39  
40  
41  
42  
43  
44  
45  
46  
47  
48  
49  
50  
51  
52  
53  
54  
55  
56  
57  
58  
59  
60

## Abstract (word count: 254)

**Background:** Children living in food insecure households have poorer mental health outcomes compared to their food-secure peers; however, the relationship between severity of food insecurity and diagnosed mental health conditions in young children remains unknown. This study examined the association between household food insecurity and reported diagnosed mental health conditions among children aged 5-11 years in Canada.

**Methods:** This study included 16,216 children aged 5-11 years living in Canada, from the 2019 Canadian Health Survey on Children and Youth. We measured household food insecurity using the Household Food Security Survey Module. We measured diagnosed mental health conditions by parent/caregiver-report of physician-diagnosed anxiety, depression, autism spectrum disorder or attention-deficit/hyperactive disorder. We developed a multivariable logistic regression model to assess the association between severities of food insecurity and mental health, controlling for potentially confounding variables.

**Results:** 17.0% of children lived in households reporting some level of food insecurity (5.4% marginal, 8.0% moderate, and 3.6% severe). The prevalence of at least one diagnosed mental health condition in the same population was 10.9%. After adjusting for socio-demographic characteristics, children from marginal, moderate and severe food insecure households had a 1.39 (95% CI 0.99-1.97), 1.46 (95% CI 1.13-1.89) and 1.67 (95% CI 1.18-2.35) increased odds of having a diagnosed mental health condition, respectively.

**Conclusion:** Household food insecurity is associated with an increased presence of diagnosed mental health conditions in children ages 5 to 11 years. This study adds to the body of research showing that social and economic inequities, including household food insecurity, negatively impact the health of children.

## Strengths and Limitations of this Study

- This study analyzed a large sample that was representative of the broader Canada population of children aged 5 to 11, so results are generalizable across this population.
- This study was able to control for a variety of socio-demographic, family, and economic variables, including parent/caregiver mental health, which reduces the risk of confounding by another variable.
- This study relies on parent/caregiver reports of household food insecurity and child mental health, which may not reflect true levels of food insecurity and mental health diagnoses.
- This is a cross-sectional study and is therefore unable to determine whether household food insecurity causes increased mental health diagnoses among children.

## Background (word count: 3267)

The prevalence of mental health conditions in children and youth is estimated at about 1 in 5 in Canada.<sup>1</sup> Prior to COVID-19, previous studies showed increasing trends in the prevalence of some mental health conditions and developmental disorders, particularly attention-deficit/hyperactive disorder (ADHD) in boys, and in the perceived need for professional help over the past 30 years.<sup>2</sup> Likewise, data from a nationally representative sample in Canada showed an increased prevalence of poor/fair mental health, anxiety and depression disorders, and increased mental health services since 2011.<sup>3</sup> Since 2020, emerging evidence indicates the COVID-19 pandemic likely exacerbated mental health issues in children and youth.<sup>4</sup>

Longitudinal research has found that mental health conditions in adolescence can have adverse health impacts in later life, such as lower self-reported general health and an increased likelihood of suicide in adulthood.<sup>5,6</sup> In addition to direct harms to individuals, there is a burden of mental illness on families and communities, including societal and economic costs.<sup>7</sup> To reduce the immediate and long-term impacts associated with these conditions, understanding key risk factors and preventing mental health conditions at an earlier age is a priority for public health.

A key social determinant of health is food insecurity. Broadly defined, food insecurity is the inability or uncertainty about being able to acquire or consume an adequate diet quality or sufficient quantity of food in socially acceptable ways.<sup>8</sup> In Canada, food insecurity is measured and monitored as a household's financial ability to access adequate food, and encompasses a range of experiences from worrying about running out of food before there is money to buy more, to compromising on the quality or quantity of food due to lack of money, to not eating for whole days due to lack of money to buy food. The prevalence of household food insecurity in Canada is high, particularly among households with children.<sup>9</sup> It is estimated that 1 in 4, or 1.8 million, children under the age of 18 in Canada lived in food insecure households in 2022.<sup>9,10</sup> Food insecurity in Canada is linked to compromised diets in children,<sup>11</sup> which negatively impacts child growth and development.<sup>12</sup> Beyond diet, exposure to adverse childhood experiences can trigger stress responses, which impact brain development and increase the risk of poor mental health through adulthood.<sup>13</sup>

Despite the high prevalence of food insecurity among children in Canada, there is limited Canadian research on the impacts of food insecurity on the mental health of young children. In longitudinal research, food insecurity in early childhood has been linked to psychosocial problems, depression, and suicide in subsequent years.<sup>14,15</sup> A recent cross-sectional study showed greater mental health care use among children living in food insecure households in Ontario.<sup>16</sup> Another recent cross-sectional study using population survey data shows poorer mental health among food insecure Canadian children and adolescents.<sup>17</sup> However, this study classifies children as food insecure solely based on the child-referenced items in the household food insecurity questionnaire, which arguably misclassifies many children living in food insecure households (as indicated by an affirmative response to at least one adult-referenced item) as 'food secure'. Research from the US has shown families of individuals with autism spectrum disorder or ADHD experience higher levels of food insecurity due to multiple social and biological mechanisms.<sup>18,19</sup> For example, parents of children with autism spectrum disorder spend more money in out-of-pocket health care expenses than those without autism spectrum disorder, impacting household finances.<sup>20</sup> No previous Canadian research has used a population-representative sample of young children to examine the relationship between severities of household food insecurity and

1  
2  
3 diagnosed mental health conditions, while controlling for key confounding factors such as parent mental  
4 health.  
5

6 We drew on the latest national population health survey of Canadian children, the 2019 Canadian  
7 Health Survey of Children and Youth (CHSCY),<sup>21</sup> to examine the association between household food  
8 insecurity and parent/caregiver reports of health professional diagnosed mental health conditions in  
9 children between the ages of 5 to 11 years, while controlling for key factors of socioeconomic and family  
10 wellbeing. This study builds on prior knowledge by examining a younger age group, multiple levels of  
11 household food insecurity and the association with specific mental health conditions and developmental  
12 disorders. Given the personal, economic and social burden of mental illness in Canada and its increase in  
13 children and youth since the COVID-pandemic,<sup>4</sup> it is crucial to understand early intervention points that  
14 could be targeted through public health policies to help mitigate future burdens.  
15  
16  
17

## 18 Methods

### 19 *Study participants*

20  
21 We examined Canadian children 5 to 11 years, whose parent or caregiver responded to the 2019 CHSCY.  
22 The CHSCY is a national health survey run by Statistics Canada that represents 98% of Canada's children  
23 and youth aged 1 to 17 years as of January 31, 2019, who lived in private dwellings across Canada's 10  
24 provinces and 3 territories.<sup>21</sup> The survey sampling frame excluded children living on First Nation  
25 reserves, other Indigenous settlements, foster homes, or children and youth who were institutionalized.  
26 Statistics Canada stratified the CHSCY population sample by sub-provincial geographic strata, sex, and  
27 age group (1-4 years, 5-11 years, and 12-17 years). Participants completed the survey predominantly  
28 online (70.0%) while 26.4% completed it by phone with an interviewer; the remaining 3.6% completed  
29 the survey in both modalities.<sup>22</sup> For children younger than 12 years, the person most knowledgeable  
30 (PMK) of the sampled child completed the survey. PMKs were the birth parent for 97% of participants.  
31 This paper refers to a child's PMK as their "parent/caregiver". Parents/caregivers reported on multiple  
32 measures of their child's health and well-being. The response rate for children 5 to 11 years was 57.8%.  
33 To ensure national representation of the population in the survey sample, Statistics Canada provides  
34 weighted and bootstrapping values to conduct analyses. A total of 16,694 children aged 5 to 11  
35 participated in CHSCY. We excluded children from our study sample if they were missing any exposure  
36 or outcome data used in the study, leaving a final analytic sample of 16,216 children.  
37  
38  
39  
40  
41  
42

### 43 *Exposure: Household food insecurity*

44 The main exposure was severity of household food insecurity, measured using the validated 18-question  
45 Household Food Security Survey Module (HFSSM).<sup>23</sup> Questions on the HFSSM measured a gradient of  
46 experiences related to food insecurity over the previous 12 months, from worrying about food running  
47 out to not eating for a whole day due to lack of money to buy more food.<sup>21</sup> We used established  
48 definitions to categorize children as food secure, marginally food insecure, moderately food insecure, or  
49 severely food insecure based on the number of affirmative answers on the HFSSM.<sup>24</sup> Food secure  
50 indicates no difficulty with income-related food access, marginally food insecure is defined as exactly  
51 one indication of difficulty with income-related food access (e.g., worried food would run out),  
52 moderately food insecure indicates compromise in the quality and/or the quantity of food consumed  
53 and lastly, severely food insecure indicates reduced food intake and disrupted eating patterns.<sup>24</sup> In  
54  
55  
56  
57  
58  
59  
60

1  
2  
3 sensitivity analyses we used a dichotomized exposure of food secure or food insecure (marginal,  
4 moderate, or severe).  
5

#### 6 *Outcome: Diagnosed mental health conditions*

7  
8 The primary outcome of this study was parent/caregiver-report of a mental health condition that is  
9 expected to last or has already lasted 6 months or more and was diagnosed by a health professional.  
10 We categorized children as having any diagnosed mental health condition if their parent/caregiver  
11 responded affirmatively to at least one of four questions related to the following long-term conditions:  
12 (1) "An anxiety disorder, such as a phobia or obsessive-compulsive disorder or a panic disorder"; (2) "A  
13 mood disorder such as depression, bipolar disorder, mania or dysthymia"; (3) "Attention deficit disorder  
14 or attention deficit hyperactivity disorder, also known as ADD or ADHD; or (4) "Autism spectrum  
15 disorder, also known as autism, autistic disorder, Asperger's disorder or pervasive developmental  
16 disorder". We also analyzed three secondary outcomes. We assessed the associations between food  
17 insecurity and autism spectrum disorder and ADHD as two separate outcomes. We assessed anxiety  
18 disorder and mood disorder grouped together because small sample sizes of children with these  
19 outcomes precluded analyzing them separately. As a sensitivity analysis, we combined the three levels  
20 of food insecurity together to create a dichotomous exposure variable and analyzed its association with  
21 the primary outcome: having any of the four mental health outcomes.  
22  
23  
24

#### 25 *Covariates*

26  
27 We identified several potential confounding variables *a priori* in the existing literature based on their  
28 established association with household food insecurity or child health outcomes.<sup>9,14,25-30</sup> Covariates  
29 included sex at birth (male, female), age (years), highest parental educational attainment (high school or  
30 less, college/trades, bachelor's or more), parent/caregiver-reported household income adjusted for  
31 household size, parent/caregiver self-perceived mental health (excellent/very good, good, fair/poor),  
32 race and ethnic origin (White/non-racialized, Black, East Asian, Indigenous, Latin American,  
33 Other/Multiple, South Asian, Southeast Asian/Filipino, West Asian/Arab), immigration status (non-  
34 immigrant, immigrant/non-permanent resident), and parent divorce/separation (yes, no).  
35  
36  
37

#### 38 *Statistical Analysis*

39  
40 We calculated weighted prevalence of mental health conditions and socio-demographic characteristics  
41 across food security categories and performed Chi-squared tests for categorical variables and t-tests for  
42 continuous variables to assess statistically significant differences between covariate groups.  
43

44 We created bivariate logistic regression models to estimate the unadjusted associations between each  
45 covariate and the mental health conditions. We created multivariable logistic regression models to  
46 estimate the association between food insecurity and mental health conditions, adjusting for age, sex,  
47 household income divided by the square root of the number of household members to adjust for  
48 household size,<sup>31</sup> highest level of parental educational attainment, parent self-perceived mental health,  
49 race or ethnic origin and Indigenous identity, child immigration status, and parent/caregiver divorce or  
50 separation.  
51  
52

53 To account for the complex survey design, in all analyses we used PROC SURVEY commands in SAS with  
54 bootstrap weights and bootstrap replications (n = 1000) provided by Statistics Canada. We assessed  
55 collinearity using variance inflation factors and none exceeded a value of 2, indicating no significant  
56  
57

1  
2  
3 collinearity. We conducted a sensitivity analysis with food security collapsed into two categories: food  
4 secure versus not food secure. We conducted all analyses using SAS Enterprise Guide (V8.2).  
5

### 6 *Ethics Approval*

7  
8 This study was approved by the Ethics Review Board of Public Health Ontario. Our study is a secondary  
9 analysis of de-identified data that was previously collected by Statistics Canada. Informed consent was  
10 obtained by Statistics Canada, the federal agency that oversaw survey procedures and data collection  
11 for CHSCY. De-identified data was provided to Public Health Ontario confidentially through the Ontario  
12 Ministry of Health.  
13

### 14 *Patient and Public Involvement*

15  
16 This study uses secondary data from a survey previously conducted by Statistics Canada. All participant  
17 identifiers had been removed from the data, so it was not possible to involve participants in the  
18 development of the research question, outcome measures, study design, conduct of the study, or  
19 dissemination of the results.  
20  
21

## 22 **Results**

23  
24 The total sample of Canadian children between the ages of 5 to 11 years included in this study was  
25 16,216. The prevalence of household food insecurity in our sample was 17.0%; 5.4% were marginally  
26 food insecure, 8.0% were moderately food insecure, and 3.6% were severely food insecure. The  
27 prevalence of any parent/caregiver-reported diagnosed mental health condition in our sample was  
28 10.9% (8.4% reported a single condition, 2.5% reported two or more conditions); 2.5% had ASD, 7.6%  
29 had ADHD, 3.4% had anxiety or depression (Figure 1).  
30  
31

32  
33 There were significant differences in most socio-demographic characteristics across food insecurity  
34 categories (Table 1). Children in households with higher levels of food insecurity tended to have lower  
35 household income, lower levels of parent education, more likely to identify as Black or Indigenous, were  
36 more likely to be born in Canada, were more likely to have a parent/caregiver with fair or poor mental  
37 health, and were more likely to have experienced parent/caregiver divorce or separation (Table 1).  
38 There were no significant differences in age or sex.  
39

40  
41 Figure 1 shows the prevalence of health professional diagnosed mental health conditions by household  
42 food insecurity status. The survey-weighted percentage of children aged 5 to 11 with a mental health  
43 diagnosis was 9.5% in food secure households, 13.5% in marginally, 17.3% in moderately and 24.8% in  
44 severely food insecure households.  
45

46  
47 In the unadjusted model of our primary outcome, household food insecurity was dose-dependently  
48 associated with increased odds of having a mental health condition (Table 2). After adjusting for  
49 confounding factors, the effect sizes and the dose-dependent relationship were diminished, yet a  
50 significant association remained for children living in moderately and severely food insecure households,  
51 who had a 1.46 (95% CI 1.13-1.89) and 1.67 (95% CI 1.18-2.35) higher risk of having any diagnosed  
52 mental health condition, respectively, compared to children living in food secure households (Table 2).  
53

54  
55 Regarding the secondary outcomes, in the unadjusted analysis of mood and/or anxiety disorders, each  
56 level of food insecurity was associated with over twice the odds of a mood and/or anxiety disorder.  
57

1  
2  
3 However, adjusting for confounding factors attenuated each association, especially the association with  
4 severe food insecurity, which was no longer statistically significant (Table 3). In the analysis of ADHD,  
5 adjusting for confounding factors also attenuated the associations between each level of food insecurity  
6 and diagnosed ADHD, although in this case only participants with severe food insecurity remained  
7 significantly more likely to have ADHD (Table 4). Similar to the other outcomes, the analysis of autism  
8 spectrum disorder showed that adjusting for confounding factors attenuated the associations between  
9 each level of food insecurity and diagnosed autism spectrum disorder, although in this case the  
10 moderately food insecure group was the only one that remained statistically significant after covariate  
11 adjustment (Table 5).  
12  
13

14  
15 Sensitivity analysis using two levels of food security, food secure and food insecure, showed associations  
16 similar to those between moderate household food insecurity and any of the four diagnosed mental  
17 health conditions, with children in food insecure households having almost 50% higher odds of having a  
18 mental health condition after adjusting for confounders (Supplementary Table 1).  
19  
20

## 21 Discussion

22  
23 This study examined the association between household food insecurity and diagnosed mental health  
24 conditions among children aged 5 to 11 years using a nationally representative sample of children in  
25 Canada. We found that children living in food insecure households were more likely to have a diagnosed  
26 mental health condition, including anxiety or mood disorders, ASD, and ADHD, and this held true after  
27 adjustment for sociodemographic and parent/caregiver characteristics. Household food insecurity was  
28 dose-dependently associated with a child's likelihood of having a diagnosed mental health condition,  
29 speaking to the importance of examining food insecurity by severity when possible. After adjusting for  
30 important confounders including income and parent/caregiver mental health, children in severely food  
31 insecure households were 67% more likely to have a diagnosed mental health condition compared to  
32 children in food secure households.  
33  
34

35  
36 Previous studies found increased odds of negative mental health outcomes among children and youth  
37 living in households experiencing food insecurity. Anderson et al. identified associations between  
38 household food security and health care visits for a mental disorder among Canadian children aged 1-  
39 17.<sup>16</sup> This study showed increasing prevalence of mental health service use with increasing household  
40 food insecurity severity, similar to our study. Men et al. identified relationships between household food  
41 security and mental health among Canadian youth aged 12-24.<sup>32</sup> Similar to our findings among children  
42 5-11 years, they showed a dose-response relationship between severity of household food insecurity  
43 and mental health, where the odds of presence of diagnosed mental health conditions increased as the  
44 severity of household food insecurity increased among adolescents and adults.<sup>32</sup> Sharifi et al. also used  
45 CHSCY to examine the relationship between food insecurity and mental health among 1-17 year olds,  
46 with similar findings to our study. Our findings expand on the results of Sharifi et al. by using household  
47 food insecurity as the exposure, which is a more sensitive measure of a child's experience of food  
48 insecurity, by testing the dose-relationship using four levels of food security, and by disaggregating  
49 developmental disorders autism spectrum disorder and ADHD.<sup>17</sup>  
50  
51  
52

53 Household food insecurity can impact a child's mental health through a number of mechanisms.<sup>14</sup>  
54 Children from severely food insecure households face reduced quality, quantity, and frequency of meals  
55 which may directly impact behavioural difficulties and mental health conditions.<sup>33</sup> An indirect pathway  
56  
57  
58

1  
2  
3 may be through parental well-being where parents and caregivers experiencing food insecurity may  
4 reduce sensitive and responsive parenting from the chronic financial and emotional stress of acquiring  
5 food, which can negatively impact the child's overall mental health.<sup>33</sup> This suggests that even if children  
6 are not themselves experiencing disrupted eating or hunger, the uncertainty around food affordability  
7 and food availability in the family is enough to precipitate mental health conditions.  
8  
9

10 Our findings also suggest that there is an association with specific mental health conditions, which is  
11 aligned with previous research. One US study of children 6 to 12 years showed that food insecurity,  
12 dichotomized into two levels, was significantly associated with ADHD.<sup>18</sup> There may also be temporal  
13 differences in exposure to food insecurity and the likelihood of developing a mood/anxiety disorder  
14 compared to a neurodevelopmental disorder. Macronutrient deficiencies affecting neurotransmitters  
15 and neuropsychiatric regulation in the early years may have effects on brain development and  
16 subsequent mental health problems.<sup>34</sup> Additionally, psychosocial and environmental effects including  
17 parental stress may contribute to the association between food insecurity and child mental health.<sup>34</sup>  
18  
19

20 One major strength of this study was examining the dose-response relationship of household food  
21 insecurity with parent/caregiver-reported diagnosed mental health conditions. Additionally, this is one  
22 of the few studies in the literature that analyzes mental health specifically among young children  
23 between 5 to 11 years in Canada. The survey used for these analyses, CHSCY, is sampled and weighted  
24 to be representative of the child population in Canada. Additionally, food insecurity was captured using  
25 the HFSSM, which is well-validated as the primary measurement tool of household food insecurity in  
26 Canada. Given the breadth of data collected in the CHSCY, we were also able to control for multiple  
27 sociodemographic, family, and economic factors in our analysis, including parent/caregiver mental  
28 health, which is an important confounder of the relationship between food security and child mental  
29 health.  
30  
31  
32

33 Certain limitations should be considered when interpreting the results. The study used a cross-sectional  
34 design and is therefore unable to determine causality or to detangle the potential bidirectional  
35 relationship between food insecurity and child mental health. For instance, poor child mental health  
36 may worsen a family's food insecurity by depleting scarce financial and time resources. Additionally,  
37 while parents/guardians are better positioned than younger children to provide accurate reporting of  
38 child health and household measures, the reliance on parental reports of both household food  
39 insecurity and health professional-diagnosed mental health conditions introduces a risk of information  
40 biases such as recall and social desirability biases. Further, parental reports have been shown to  
41 underestimate children's experience of food insecurity, compared to child reports.<sup>35</sup> To whatever degree  
42 this bias was present in our study, it would underestimate food insecurity and likely bias our results  
43 towards the null. It is also important to note some limitations of the CHSCY survey. Although the CHSCY  
44 data provides nationally representative data, the 2019 response rate to this survey cycle was only 57.8%  
45 for children 5 to 11 years and 51.8% overall.<sup>22</sup> This may introduce some selection bias in the population  
46 surveyed, although the impact on our findings, if any, is unclear given the correcting use of bootstrap  
47 weights and replicates, and existing evidence that response rates on health surveys is not related to  
48 nonresponse bias or data representativeness.<sup>36</sup>  
49  
50  
51  
52  
53  
54  
55  
56  
57  
58  
59  
60



## Conclusion

This study found that Canadian children aged 5-11 who live in food insecure households are more likely to have been diagnosed with a mental health condition than children in food secure households. Compounded by the increases in child mental health conditions and rising food insecurity rates, both food insecurity and mental health are public health priorities. This study supports the need to implement policies that are focused on creating sustainable systems to alleviate the burden of food insecurity on mental health.

For peer review only

## Tables and Figures

**Table 1: Characteristics of study population of children age 5-11, by food security status; Canada, 2019**

| Characteristics                                                    | Total  | Food secure | Marginally food insecure | Moderately food insecure | Severely food insecure | P-value for differences across groups |
|--------------------------------------------------------------------|--------|-------------|--------------------------|--------------------------|------------------------|---------------------------------------|
| <b>Age (Mean years)</b>                                            | 8.0    | 8.0         | 7.9                      | 8.0                      | 8.2                    | 0.0883                                |
| <b>Sex</b>                                                         |        |             |                          |                          |                        |                                       |
| <b>Female</b>                                                      | 48.7   | 48.6        | 53.4                     | 47.0                     | 49.5                   | 0.2253                                |
| <b>Male</b>                                                        | 51.3   | 51.4        | 46.6                     | 53.0                     | 50.5                   | 0.2253                                |
| <b>Household income adjusted for household size (Mean dollars)</b> | 52,786 | 57,781      | 31,365                   | 28,355                   | 23,969                 | <.0001                                |
| <b>Highest parental education</b>                                  |        |             |                          |                          |                        |                                       |
| <b>High school or less</b>                                         | 13.6   | 10.7        | 22.8                     | 28.6                     | 33.1                   | <.0001                                |
| <b>College/Trades</b>                                              | 38.3   | 36.6        | 42.8                     | 48.0                     | 49.5                   | <.0001                                |
| <b>Bachelor's or more</b>                                          | 48.2   | 52.8        | 34.3                     | 23.4                     | 17.4                   | <.0001                                |
| <b>Race and ethnic origin</b>                                      |        |             |                          |                          |                        |                                       |
| <b>Black</b>                                                       | 5.6    | 4.7         | 8.4                      | 10.9                     | 8.3                    | <.0001                                |
| <b>East Asian</b>                                                  | 4.7    | 5.2         | 3.1                      | 2.9                      | 0.6                    | <.0001                                |
| <b>Indigenous</b>                                                  | 5.1    | 3.9         | 10.5                     | 9.3                      | 15.8                   | <.0001                                |
| <b>Latin American</b>                                              | 1.1    | 1.0         | 2.6                      | 2.1                      | 0.8                    | <.0001                                |
| <b>Other/Multiple</b>                                              | 2.1    | 1.9         | 4.2                      | 3.3                      | 1.8                    | <.0001                                |
| <b>South Asian</b>                                                 | 7.1    | 7.6         | 6.4                      | 4.8                      | 1.5                    | <.0001                                |
| <b>Southeast Asian/Filipino</b>                                    | 4.1    | 3.8         | 7.9                      | 6.4                      | 2.0                    | <.0001                                |
| <b>West Asian/Arab</b>                                             | 3.2    | 3.2         | 3.8                      | 2.8                      | 4.0                    | <.0001                                |
| <b>White/non-racialized</b>                                        | 66.8   | 68.7        | 53.2                     | 57.4                     | 65.2                   | <.0001                                |
| <b>Child immigration status</b>                                    |        |             |                          |                          |                        |                                       |
| <b>Immigrant/non-perm resident</b>                                 | 9.0    | 8.8         | 15.0                     | 8.0                      | 4.9                    | <.0001                                |
| <b>Not immigrant/non-perm resident</b>                             | 91.0   | 91.2        | 85.0                     | 92.0                     | 95.1                   | <.0001                                |
| <b>Experience parental separation</b>                              |        |             |                          |                          |                        |                                       |
| <b>Experienced separation/divorce</b>                              | 18.8   | 15.9        | 25.6                     | 32.1                     | 46.2                   | <.0001                                |
| <b>Never experienced separation/divorce</b>                        | 81.2   | 84.1        | 74.4                     | 67.9                     | 53.8                   | <.0001                                |
| <b>PMK mental health</b>                                           |        |             |                          |                          |                        |                                       |
| <b>Excellent/very good</b>                                         | 71.6   | 74.6        | 66.7                     | 56.9                     | 40.7                   | <.0001                                |
| <b>Good</b>                                                        | 22.8   | 21.2        | 26.3                     | 32.9                     | 33.1                   | <.0001                                |
| <b>Fair/poor</b>                                                   | 5.6    | 4.2         | 7.0                      | 10.2                     | 26.3                   | <.0001                                |

1  
2  
3  
4  
5  
6  
7  
8  
9  
10  
11  
12  
13  
14  
15  
16  
17  
18  
19  
20  
21  
22  
23  
24  
25  
26  
27  
28  
29  
30  
31  
32  
33  
34  
35  
36  
37  
38  
39  
40  
41  
42  
43  
44  
45  
46  
47  
48  
49  
50  
51  
52  
53  
54  
55  
56  
57  
58  
59  
60

For peer review only

**Table 2: Unadjusted and adjusted logistic regression models of the association between household food insecurity status and any diagnosed mental health condition**

| Variable                                                   | Unadjusted OR (95% CI) | Adjusted OR (95% CI) |
|------------------------------------------------------------|------------------------|----------------------|
| <b>Household Food Security</b>                             |                        |                      |
| Food Secure                                                | REF                    | REF                  |
| Marginally Food Insecure                                   | 1.49 (1.08, 2.06)      | 1.39 (0.99, 1.97)    |
| Moderately Food Insecure                                   | 1.99 (1.58, 2.52)      | 1.46 (1.13, 1.89)    |
| Severely Food Insecure                                     | 3.15 (2.32, 4.27)      | 1.67 (1.18, 2.35)    |
| Age (years)                                                | 1.24 (1.20, 1.29)      | 1.25 (1.21, 1.30)    |
| <b>Sex</b>                                                 |                        |                      |
| Female                                                     | REF                    | REF                  |
| Male                                                       | 2.44 (2.08, 2.87)      | 2.70 (2.29, 3.19)    |
| Household Income (adjusted for household size, per \$5000) | 0.96 (0.94, 0.98)      | 0.99 (0.97, 1.01)    |
| <b>Highest Level Parent Education</b>                      |                        |                      |
| High school or less                                        | REF                    | REF                  |
| College/Trades                                             | 0.80 (0.65, 0.98)      | 0.97 (0.78, 1.19)    |
| University or more                                         | 0.49 (0.40, 0.60)      | 0.80 (0.63, 1.01)    |
| <b>Parent's Mental Health Status</b>                       |                        |                      |
| Excellent/Very good                                        | REF                    | REF                  |
| Good                                                       | 2.33 (1.96, 2.77)      | 1.95 (1.63, 2.34)    |
| Fair/Poor                                                  | 4.34 (3.45, 5.46)      | 3.60 (2.80, 4.63)    |
| <b>Race and ethnic origin</b>                              |                        |                      |
| White/non-racialized                                       | REF                    | REF                  |
| Black                                                      | 0.79 (0.57, 1.09)      | 0.83 (0.58, 1.18)    |
| East Asian                                                 | 0.58 (0.39, 0.86)      | 0.78 (0.51, 1.18)    |
| Indigenous                                                 | 1.58 (1.20, 2.10)      | 1.11 (0.83, 1.48)    |
| Latin American                                             | 0.56 (0.25, 1.24)      | 0.67 (0.30, 1.51)    |
| Other/Multiple                                             | 0.74 (0.42, 1.28)      | 0.67 (0.38, 1.20)    |
| South Asian                                                | 0.29 (0.19, 0.43)      | 0.42 (0.28, 0.65)    |
| Southeast Asian/Filipino                                   | 0.53 (0.33, 0.85)      | 0.68 (0.41, 1.14)    |
| West Asian/Arab                                            | 0.35 (0.17, 0.71)      | 0.46 (0.21, 1.02)    |
| <b>Immigration Status</b>                                  |                        |                      |
| Non-immigrant                                              | REF                    | REF                  |
| Immigrant/non-permanent resident                           | 0.35 (0.24, 0.52)      | 0.47 (0.31, 0.72)    |
| <b>Divorce/Separation</b>                                  |                        |                      |
| No                                                         | REF                    | REF                  |
| Yes                                                        | 2.26 (1.90, 2.68)      | 1.47 (1.22, 1.77)    |

**Table 3: Unadjusted and adjusted logistic regression models of the association between household food insecurity status and a diagnosed mood or anxiety disorder**

| Variable                                                   | Unadjusted OR (95% CI) | Adjusted OR (95% CI) |
|------------------------------------------------------------|------------------------|----------------------|
| <b>Household Food Security</b>                             |                        |                      |
| Food Secure                                                | REF                    | REF                  |
| Marginally Food Insecure                                   | 2.27 (1.40, 3.67)      | 2.18 (1.33, 3.60)    |
| Moderately Food Insecure                                   | 2.29 (1.56, 3.35)      | 1.73 (1.15, 2.59)    |
| Severely Food Insecure                                     | 2.92 (1.84, 4.63)      | 1.48 (0.90, 2.43)    |
| Age (years)                                                | 1.30 (1.21, 1.39)      | 1.30 (1.21, 1.39)    |
| <b>Sex</b>                                                 |                        |                      |
| Female                                                     | REF                    | REF                  |
| Male                                                       | 1.52 (1.17, 1.97)      | 1.60 (1.22, 2.09)    |
| Household Income (adjusted for household size, per \$5000) | 0.97 (0.94, 1.00)      | 1.00 (0.97, 1.03)    |
| <b>Highest Level Parent Education</b>                      |                        |                      |
| High school or less                                        | REF                    | REF                  |
| College/Trades                                             | 1.09 (0.76, 1.57)      | 1.39 (0.93, 2.06)    |
| University or more                                         | 0.64 (0.44, 0.93)      | 1.14 (0.75, 1.75)    |
| <b>Parent's Mental Health Status</b>                       |                        |                      |
| Excellent/Very good                                        | REF                    | REF                  |
| Good                                                       | 3.45 (2.58, 4.61)      | 2.86 (2.12, 3.87)    |
| Fair/Poor                                                  | 6.03 (4.25, 8.56)      | 4.85 (3.37, 7.00)    |
| <b>Race and ethnic origin</b>                              |                        |                      |
| White/non-racialized                                       | REF                    | REF                  |
| Black                                                      | 0.52 (0.25, 1.06)      | 0.55 (0.26, 1.15)    |
| East Asian                                                 | 0.58 (0.30, 1.14)      | 0.78 (0.39, 1.56)    |
| Indigenous                                                 | 1.67 (1.06, 2.64)      | 1.17 (0.74, 1.86)    |
| Latin American                                             | 0.66 (0.07, 5.88)      | 0.74 (0.08, 6.52)    |
| Other/Multiple                                             | 1.03 (0.34, 3.10)      | 0.96 (0.33, 2.81)    |
| South Asian                                                | 0.26 (0.09, 0.72)      | 0.38 (0.13, 1.09)    |
| Southeast Asian/Filipino                                   | 0.28 (0.11, 0.71)      | 0.36 (0.14, 0.91)    |
| West Asian/Arab                                            | 0.20 (0.05, 0.75)      | 0.28 (0.07, 1.04)    |
| <b>Immigration Status</b>                                  |                        |                      |
| Non-immigrant                                              | REF                    | REF                  |
| Immigrant/non-permanent resident                           | 0.39 (0.20, 0.75)      | 0.64 (0.32, 1.27)    |
| <b>Divorce/Separation</b>                                  |                        |                      |
| No                                                         | REF                    | REF                  |
| Yes                                                        | 2.13 (1.62, 2.80)      | 1.27 (0.93, 1.72)    |

**Table 4: Unadjusted and adjusted logistic regression models of the association between household food insecurity status and diagnosed attention deficit hyperactivity disorder**

| Variable                                                   | Unadjusted OR (95% CI) | Adjusted OR (95% CI) |
|------------------------------------------------------------|------------------------|----------------------|
| <b>Household Food Security</b>                             |                        |                      |
| Food Secure                                                | REF                    | REF                  |
| Marginally Food Insecure                                   | 1.37 (0.89, 2.11)      | 1.23 (0.79, 1.93)    |
| Moderately Food Insecure                                   | 1.86 (1.39, 2.51)      | 1.30 (0.95, 1.78)    |
| Severely Food Insecure                                     | 3.35 (2.38, 4.73)      | 1.64 (1.12, 2.39)    |
| Age (years)                                                | 1.30 (1.24, 1.35)      | 1.30 (1.25, 1.37)    |
| <b>Sex</b>                                                 |                        |                      |
| Female                                                     | REF                    | REF                  |
| Male                                                       | 2.67 (2.18, 3.29)      | 2.98 (2.41, 3.68)    |
| Household Income (adjusted for household size, per \$5000) | 0.94 (0.92, 0.97)      | 0.97 (0.95, 1.00)    |
| <b>Highest Level Parent Education</b>                      |                        |                      |
| High school or less                                        | REF                    | REF                  |
| College/Trades                                             | 0.70 (0.55, 0.88)      | 0.84 (0.66, 1.08)    |
| University or more                                         | 0.40 (0.31, 0.51)      | 0.67 (0.51, 0.90)    |
| <b>Parent's Mental Health Status</b>                       |                        |                      |
| Excellent/Very good                                        | REF                    | REF                  |
| Good                                                       | 2.16 (1.76, 2.66)      | 1.71 (1.38, 2.12)    |
| Fair/Poor                                                  | 3.70 (2.80, 4.91)      | 2.85 (2.09, 3.88)    |
| <b>Race and ethnic origin</b>                              |                        |                      |
| White/non-racialized                                       | REF                    | REF                  |
| Black                                                      | 0.67 (0.43, 1.03)      | 0.66 (0.42, 1.03)    |
| East Asian                                                 | 0.44 (0.25, 0.78)      | 0.60 (0.33, 1.09)    |
| Indigenous                                                 | 1.64 (1.18, 2.27)      | 1.10 (0.79, 1.56)    |
| Latin American                                             | 0.34 (0.11, 1.01)      | 0.41 (0.14, 1.23)    |
| Other/Multiple                                             | 0.46 (0.20, 1.04)      | 0.41 (0.18, 0.94)    |
| South Asian                                                | 0.15 (0.09, 0.27)      | 0.22 (0.12, 0.39)    |
| Southeast Asian/Filipino                                   | 0.34 (0.16, 0.70)      | 0.43 (0.20, 0.93)    |
| West Asian/Arab                                            | 0.42 (0.18, 0.96)      | 0.53 (0.21, 1.33)    |
| <b>Immigration Status</b>                                  |                        |                      |
| Non-immigrant                                              | REF                    | REF                  |
| Immigrant/non-permanent resident                           | 0.34 (0.20, 0.57)      | 0.51 (0.29, 0.89)    |
| <b>Divorce/Separation</b>                                  |                        |                      |
| No                                                         | REF                    | REF                  |
| Yes                                                        | 2.62 (2.15, 3.19)      | 1.62 (1.31, 2.00)    |

**Table 5: Unadjusted and adjusted logistic regression models of the association between household food insecurity status and diagnosed autism spectrum disorder**

| Variable                                                   | Unadjusted OR (95% CI) | Adjusted OR (95% CI) |
|------------------------------------------------------------|------------------------|----------------------|
| <b>Household Food Security</b>                             |                        |                      |
| Food Secure                                                | REF                    | REF                  |
| Marginally Food Insecure                                   | 1.73 (1.04, 2.87)      | 1.53 (0.90, 2.59)    |
| Moderately Food Insecure                                   | 2.37 (1.59, 3.55)      | 1.74 (1.14, 2.64)    |
| Severely Food Insecure                                     | 2.80 (1.72, 4.57)      | 1.70 (0.98, 2.94)    |
| Age (years)                                                | 0.97 (0.91, 1.04)      | 0.97 (0.91, 1.04)    |
| <b>Sex</b>                                                 |                        |                      |
| Female                                                     | REF                    | REF                  |
| Male                                                       | 4.07 (2.80, 5.90)      | 4.13 (2.85, 6.01)    |
| Household Income (adjusted for household size, per \$5000) | 0.95 (0.90, 1.00)      | 0.98 (0.93, 1.03)    |
| <b>Highest Level Parent Education</b>                      |                        |                      |
| High school or less                                        | REF                    | REF                  |
| College/Trades                                             | 0.85 (0.57, 1.27)      | 1.01 (0.67, 1.53)    |
| University or more                                         | 0.61 (0.40, 0.92)      | 0.90 (0.57, 1.41)    |
| <b>Parent's Mental Health Status</b>                       |                        |                      |
| Excellent/Very good                                        | REF                    | REF                  |
| Good                                                       | 1.87 (1.34, 2.63)      | 1.69 (1.21, 2.38)    |
| Fair/Poor                                                  | 4.35 (2.97, 6.36)      | 3.77 (2.51, 5.64)    |
| <b>Race and ethnic origin</b>                              |                        |                      |
| White/non-racialized                                       | REF                    | REF                  |
| Black                                                      | 1.27 (0.75, 2.16)      | 1.29 (0.71, 2.35)    |
| East Asian                                                 | 1.04 (0.58, 1.87)      | 1.28 (0.69, 2.35)    |
| Indigenous                                                 | 1.29 (0.71, 2.34)      | 0.96 (0.53, 1.73)    |
| Latin American                                             | 0.53 (0.01, 31.5)      | 0.59 (0.01, 35.1)    |
| Other/Multiple                                             | 2.06 (0.95, 4.49)      | 1.74 (0.77, 3.90)    |
| South Asian                                                | 0.67 (0.38, 1.18)      | 0.92 (0.49, 1.72)    |
| Southeast Asian/Filipino                                   | 1.43 (0.70, 2.94)      | 1.59 (0.73, 3.46)    |
| West Asian/Arab                                            | 0.31 (0.03, 2.92)      | 0.40 (0.04, 3.76)    |
| <b>Immigration Status</b>                                  |                        |                      |
| Non-immigrant                                              | REF                    | REF                  |
| Immigrant/non-permanent resident                           | 0.50 (0.19, 1.33)      | 0.57 (0.19, 1.65)    |
| <b>Divorce/Separation</b>                                  |                        |                      |
| No                                                         | REF                    | REF                  |
| Yes                                                        | 1.34 (0.97, 1.85)      | 0.99 (0.69, 1.41)    |

## Footnotes

**Twitter / X:** @sarahcarsley

**Contributors:** JT, SO, SN, and SC contributed to conceptualizing and designing the study, and preparing the manuscript draft. JT conducted the statistical analysis. SC validated the analysis and provided project

1  
2  
3 oversight. JT, SO, and SC contributed to developing and refining the methods, and interpreting the  
4 results. JT, SO, SN, DH, and SC reviewed the manuscript for intellectual content and approved the final  
5 version for publication.  
6

7 **Competing interests:** None to declare.  
8

9 **Funding:** No financial support provided.  
10

11 **Data sharing statement:** Data may be obtained from a third party and are not publicly available. The  
12 Canadian Health Survey on Children and Youth data are de-identified participant data, available upon  
13 successful application to Statistics Canada's Research Data Centre program:  
14

15 <https://www.statcan.gc.ca/eng/rdc/index>  
16

17 **Ethics approval:** Approved by the Ethics Review Board of Public Health Ontario  
18 (File number: 2022-003.03)  
19  
20  
21  
22  
23  
24  
25  
26  
27  
28  
29  
30  
31  
32  
33  
34  
35  
36  
37  
38  
39  
40  
41  
42  
43  
44  
45  
46  
47  
48  
49  
50  
51  
52  
53  
54  
55  
56  
57  
58  
59  
60



## References

1. Mental Health Commission of Canada. Children and Youth. Ottawa, ON: Health Canada; 2017 [cited 2023 August 31]. Available from: <https://mentalhealthcommission.ca/what-we-do/children-and-youth/>
2. Comeau J, Georgiades K, Duncan LA-O, Wang L, Boyle MH. Changes in the Prevalence of Child and Youth Mental Disorders and Perceived Need for Professional Help between 1983 and 2014: Evidence from the Ontario Child Health Study. (1497-0015 (Electronic)). Available from:
3. Wiens K, Bhattarai A, Pedram P, Dores A, Williams J, Bulloch A, et al. A growing need for youth mental health services in Canada: examining trends in youth mental health from 2011 to 2018. *Epidemiology and psychiatric sciences*. 2020;29:e115. Available from: <https://doi.org/10.1017/S2045796020000281>
4. Madigan S, Racine N, Vaillancourt T, Korczak DJ, Hewitt JMA, Pador P, et al. Changes in Depression and Anxiety Among Children and Adolescents From Before to During the COVID-19 Pandemic: A Systematic Review and Meta-analysis. *JAMA Pediatrics*. 2023;177(6):567-81. Available from: <https://doi.org/10.1001/jamapediatrics.2023.0846>
5. Johnson D, Dupuis G, Piche J, Clayborne Z, Colman I. Adult mental health outcomes of adolescent depression: A systematic review. *Depression and Anxiety*. 2018;35(8):700-16. Available from: <https://doi.org/https://doi.org/10.1002/da.22777>
6. Kessler RC, Avenevoli S, Costello EJ, Georgiades K, Green JG, Gruber MJ, et al. Prevalence, Persistence, and Sociodemographic Correlates of DSM-IV Disorders in the National Comorbidity Survey Replication Adolescent Supplement. *Archives of General Psychiatry*. 2012;69(4):372-80. Available from: <https://doi.org/10.1001/archgenpsychiatry.2011.160>
7. Ahmad S, Briante C, Khan M, Smetanin P, Stiff D. The life and economic impact of major mental illnesses in Canada. Ottawa, Ontario: Canadian Electronic Library; 2015.
8. Government of Canada. Household food insecurity in Canada: Overview Available from: <https://www.canada.ca/en/health-canada/services/food-nutrition/food-nutrition-surveillance/health-nutrition-surveys/canadian-community-health-survey-cchs/household-food-insecurity-canada-overview.html>
9. Tarasuk V LT, Fafard St-Germain AA. Household food insecurity in Canada, 2021. . Toronto: Research to identify policy options to reduce food insecurity (PROOF). ; 2022. Available from: <https://proof.utoronto.ca/wp-content/uploads/2023/11/Household-Food-Insecurity-in-Canada-2022-PROOF.pdf>
10. Statistics Canada. Table 13-10-0835-01 Food insecurity by selected demographic characteristics. Ottawa, ON; 2023. Available from: <https://www150.statcan.gc.ca/t1/tbl1/en/tv.action?pid=1310083501>
11. Hutchinson J, Tarasuk V. The relationship between diet quality and the severity of household food insecurity in Canada. *Public Health Nutrition*. 2021;25(4):1013-26. Available from: <https://doi.org/10.1017/S1368980021004031>
12. Owen L, Corfe B. The role of diet and nutrition on mental health and wellbeing. *Proceedings of the Nutrition Society*. 2017;76(4):425-6. Available from: <https://doi.org/10.1017/S0029665117001057>
13. Merrick MT, Ports KA, Ford DC, Afifi TO, Gershoff ET, Grogan-Kaylor A. Unpacking the impact of adverse childhood experiences on adult mental health. *Child Abuse & Neglect*. 2017;69:10-9. Available from: <https://doi.org/https://doi.org/10.1016/j.chiabu.2017.03.016>
14. Melchior M, Chastang J-F, Falissard B, Galéra C, Tremblay RE, Côté SM, et al. Food Insecurity and Children's Mental Health: A Prospective Birth Cohort Study. *PLOS ONE*. 2012;7(12):e52615. Available from: <https://doi.org/10.1371/journal.pone.0052615>

15. Paquin V, Muckle G, Bolanis D, Courtemanche Y, Castellanos-Ryan N, Boivin M, et al. Longitudinal Trajectories of Food Insecurity in Childhood and Their Associations With Mental Health and Functioning in Adolescence. *JAMA Network Open*. 2021;4(12):e2140085-e. Available from: <https://doi.org/10.1001/jamanetworkopen.2021.40085>
16. Anderson KK, Clemens KK, Le B, Zhang L, Comeau J, Tarasuk V, et al. Household food insecurity and health service use for mental and substance use disorders among children and adolescents in Ontario, Canada. *Canadian Medical Association Journal*. 2023;195(28):E948-E55. Available from: <https://doi.org/10.1503/cmaj.230332>
17. Sharifi V, Dimitropoulos G, Williams JVA, Rao S, Pedram P, Bulloch AGM, et al. Food Insecurity is Associated with Poor Mental Health in Canadian Children and Adolescents. *The Canadian Journal of Psychiatry*. 2024;69(4):296-8. Available from: <https://doi.org/10.1177/07067437231225938>
18. Hatsu IE, Eiterman L, Stern M, Lu S, Johnstone JM, Leung BMY, et al. Household Food Insecurity Is Associated with Symptoms of Emotional Dysregulation in Children with Attention Deficit Hyperactivity Disorder: The MADDY Study. *Nutrients*. 2022;14(6):1306. Available from:
19. Karpur A, Vasudevan V, Lello A, Frazier TW, Shih A. Food insecurity in the households of children with autism spectrum disorders and intellectual disabilities in the United States: Analysis of the National Survey of Children's Health Data 2016–2018. *Autism*. 2021;25(8):2400-11. Available from: <https://doi.org/10.1177/13623613211019159>
20. Rogge N, Janssen J. The Economic Costs of Autism Spectrum Disorder: A Literature Review. *Journal of Autism and Developmental Disorders*. 2019;49(7):2873-900. Available from: <https://doi.org/10.1007/s10803-019-04014-z>
21. Statistics Canada. Canadian Health Survey on Children and Youth (CHSCY). [updated February 11, 2019; cited 2022 June 14]. Available from: <https://www23.statcan.gc.ca/imdb/p2SV.pl?Function=getSurvey&SDDS=5233>
22. Statistics Canada. 2019 Canadian Health Survey on Children and Youth (CHSCY): User Guide; 2020
23. Government of Canada. The Household Food Security Survey Module (HFSSM). [updated 2012-07-25; cited 2023 March 10]. Available from: <https://www.canada.ca/en/health-canada/services/food-nutrition/food-nutrition-surveillance/health-nutrition-surveys/canadian-community-health-survey-cchs/household-food-insecurity-canada-overview/household-food-security-survey-module-hfssm-health-nutrition-surveys-health-canada.html>
24. Government of Canada. Determining food security status. 2020 [updated 2020-02-18]. Available from: <https://www.canada.ca/en/health-canada/services/food-nutrition/food-nutrition-surveillance/health-nutrition-surveys/canadian-community-health-survey-cchs/household-food-insecurity-canada-overview/determining-food-security-status-food-nutrition-surveillance-health-canada.html>
25. Fernández CR, Yomogida M, Aratani Y, Hernández D. Dual Food and Energy Hardship and Associated Child Behavior Problems. *Academic pediatrics*. 2018;18(8):889-96. Available from: <https://doi.org/10.1016/j.acap.2018.07.002>
26. Liu R, Urquia ML, Tarasuk V. The prevalence and predictors of household food insecurity among adolescents in Canada. *Canadian Journal of Public Health*. 2023;114(3):453-63. Available from: <https://doi.org/10.17269/s41997-022-00737-2>
27. McIntyre L, Wu X, Kwok C, Patten SB. The pervasive effect of youth self-report of hunger on depression over 6 years of follow up. *Social psychiatry and psychiatric epidemiology*. 2017;52(5):537-47. Available from: <https://doi.org/10.1007/s00127-017-1361-5>
28. McLaughlin KA, Green JG, Alegría M, Jane Costello E, Gruber MJ, Sampson NA, et al. Food Insecurity and Mental Disorders in a National Sample of U.S. Adolescents. *Journal of the*

- 1  
2  
3 American Academy of Child & Adolescent Psychiatry. 2012;51(12):1293-303. Available from:  
4 <https://doi.org/https://doi.org/10.1016/j.jaac.2012.09.009>
- 5 29. PROOF. Food Insecurity and Mental Health. [updated February 22, 2018; cited 2023 March 10].  
6 Available from: <https://proof.utoronto.ca/resource/food-insecurity-and-mental-health/>
- 7 30. Tarasuk V, Fafard St-Germain A-A, Mitchell A. Geographic and socio-demographic predictors of  
8 household food insecurity in Canada, 2011–12. *BMC Public Health*. 2019;19(1):12. Available  
9 from: <https://doi.org/10.1186/s12889-018-6344-2>
- 10 31. Statistics Canada. Adjusted total income of private household. 2016 [updated 2019-04-03; cited  
11 2023 July 27]. Available from:  
12 <https://www23.statcan.gc.ca/imdb/p3Var.pl?Function=DEC&Id=252278>
- 13 32. Men F, Elgar FJ, Tarasuk V. Food insecurity is associated with mental health problems among  
14 Canadian youth. *Journal of Epidemiology and Community Health*. 2021;75(8):741-8. Available  
15 from: <https://doi.org/10.1136/jech-2020-216149>
- 16 33. Ashiabi GS, O'Neal KK. A Framework for Understanding the Association Between Food Insecurity  
17 and Children's Developmental Outcomes. *Child development perspectives*. 2008;2(2):71-7.  
18 Available from: <https://doi.org/10.1111/j.1750-8606.2008.00049.x>
- 19 34. Cain KS, Meyer SC, Cummer E, Patel KK, Casacchia NJ, Montez K, et al. Association of Food  
20 Insecurity with Mental Health Outcomes in Parents and Children. *Academic pediatrics*.  
21 2022;22(7):1105-14. Available from: <https://doi.org/https://doi.org/10.1016/j.acap.2022.04.010>
- 22 35. Bernard R, Hammarlund R, Bouquet M, Ojewole T, Kirby D, Grizzaffi J, et al. Parent and Child  
23 Reports of Food Insecurity and Mental Health: Divergent Perspectives. *Ochsner Journal*.  
24 2018;18(4):318-25. Available from: <https://doi.org/10.31486/toj.18.0037>
- 25 36. Lee S, Brown ER, Grant D, Belin TR, Brick JM. Exploring Nonresponse Bias in a Health Survey  
26 Using Neighborhood Characteristics. *American Journal of Public Health*. 2009;99(10):1811-7.  
27 Available from: <https://doi.org/10.2105/ajph.2008.154161>
- 28  
29  
30  
31  
32  
33  
34

## Figure legend

35  
36  
37  
38 **Title:** Figure 1 - Prevalence of diagnosed mental health conditions in children 5-11, by food security  
39 status; Canada, 2019

40  
41 **Footnotes:** PMK = Person Most Knowledgeable, ASD = Autism Spectrum Disorder, ADHD = Attention Deficit Hyperactivity  
42 Disorder

43 \*Interpret estimate with caution due to a Coefficient of Variation greater than 15%

44  
45  
46  
47  
48  
49  
50  
51  
52  
53  
54  
55  
56  
57  
58  
59  
60

1  
2  
3  
4  
5  
6  
7  
8  
9  
10  
11  
12  
13  
14  
15  
16  
17  
18  
19  
20  
21  
22  
23  
24  
25  
26  
27  
28  
29  
30  
31  
32  
33  
34  
35  
36  
37  
38  
39  
40  
41  
42  
43  
44  
45  
46  
47  
48  
49  
50  
51  
52  
53  
54  
55  
56  
57  
58  
59  
60

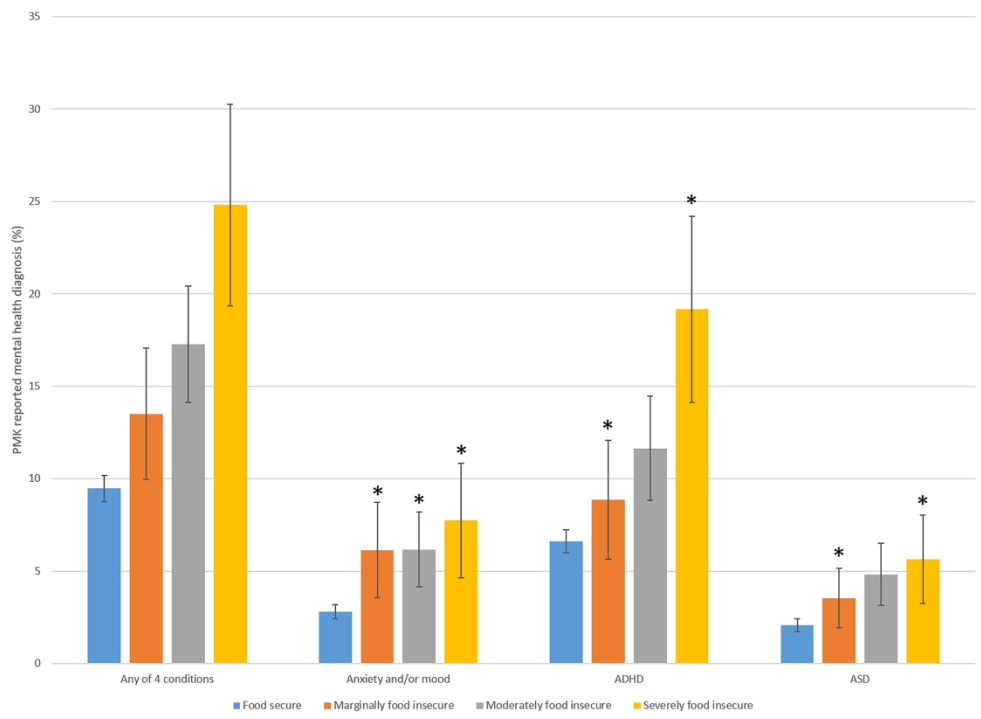

265x191mm (300 x 300 DPI)

**Supplementary Table 1: Unadjusted and adjusted logistic regression models of the association between household food insecurity and any diagnosed mental health condition**

| Variable                                                   | Unadjusted OR (95% CI) | Adjusted OR (95% CI) |
|------------------------------------------------------------|------------------------|----------------------|
| <b>Household Food Security</b>                             |                        |                      |
| Food Secure                                                | REF                    | REF                  |
| Food Insecure (marginal, moderate, or severe)              | 2.05 (1.72, 2.44)      | 1.49 (1.22, 1.82)    |
| Age (years)                                                | 1.24 (1.20, 1.29)      | 1.25 (1.21, 1.30)    |
| <b>Sex</b>                                                 |                        |                      |
| Female                                                     | REF                    | REF                  |
| Male                                                       | 2.44 (2.08, 2.87)      | 2.70 (2.29, 3.19)    |
| Household Income (adjusted for household size, per \$5000) | 0.96 (0.94, 0.98)      | 0.99 (0.97, 1.01)    |
| <b>Highest Level Parent Education</b>                      |                        |                      |
| High school or less                                        | REF                    | REF                  |
| College/Trades                                             | 0.80 (0.65, 0.98)      | 0.96 (0.78, 1.19)    |
| University or more                                         | 0.49 (0.40, 0.60)      | 0.79 (0.63, 1.01)    |
| <b>Parent's Mental Health Status</b>                       |                        |                      |
| Excellent/Very good                                        | REF                    | REF                  |
| Good                                                       | 2.33 (1.96, 2.77)      | 1.95 (1.63, 2.34)    |
| Fair/Poor                                                  | 4.34 (3.45, 5.46)      | 3.66 (2.84, 4.70)    |
| <b>Race and ethnic origin</b>                              |                        |                      |
| White/non-racialized                                       | REF                    | REF                  |
| Black                                                      | 0.79 (0.57, 1.09)      | 0.83 (0.58, 1.18)    |
| East Asian                                                 | 0.58 (0.39, 0.86)      | 0.78 (0.51, 1.18)    |
| Indigenous                                                 | 1.58 (1.20, 2.10)      | 1.11 (0.82, 1.48)    |
| Latin American                                             | 0.56 (0.25, 1.24)      | 0.66 (0.29, 1.49)    |
| Other/Multiple                                             | 0.74 (0.42, 1.28)      | 0.67 (0.37, 1.19)    |
| South Asian                                                | 0.29 (0.19, 0.43)      | 0.42 (0.28, 0.64)    |
| Southeast Asian/Filipino                                   | 0.53 (0.33, 0.85)      | 0.68 (0.41, 1.13)    |
| West Asian/Arab                                            | 0.35 (0.17, 0.71)      | 0.47 (0.21, 1.02)    |
| <b>Immigration Status</b>                                  |                        |                      |
| Non-immigrant                                              | REF                    | REF                  |
| Immigrant/non-permanent resident                           | 0.35 (0.24, 0.52)      | 0.47 (0.31, 0.72)    |
| <b>Divorce/Separation</b>                                  |                        |                      |
| No                                                         | REF                    | REF                  |
| Yes                                                        | 2.26 (1.90, 2.68)      | 1.47 (1.22, 1.78)    |

STROBE Statement—Checklist of items that should be included in reports of *cross-sectional studies*

|                              | Item No | Recommendation                                                                                                                                                                                               | Page No |
|------------------------------|---------|--------------------------------------------------------------------------------------------------------------------------------------------------------------------------------------------------------------|---------|
| <b>Title and abstract</b>    | 1       | (a) Indicate the study's design with a commonly used term in the title or the abstract                                                                                                                       | 1       |
|                              |         | (b) Provide in the abstract an informative and balanced summary of what was done and what was found                                                                                                          | 2       |
| <b>Introduction</b>          |         |                                                                                                                                                                                                              |         |
| Background/rationale         | 2       | Explain the scientific background and rationale for the investigation being reported                                                                                                                         | 3       |
| Objectives                   | 3       | State specific objectives, including any prespecified hypotheses                                                                                                                                             | 3       |
| <b>Methods</b>               |         |                                                                                                                                                                                                              |         |
| Study design                 | 4       | Present key elements of study design early in the paper                                                                                                                                                      | 4       |
| Setting                      | 5       | Describe the setting, locations, and relevant dates, including periods of recruitment, exposure, follow-up, and data collection                                                                              | 4       |
| Participants                 | 6       | (a) Give the eligibility criteria, and the sources and methods of selection of participants                                                                                                                  | 4       |
| Variables                    | 7       | Clearly define all outcomes, exposures, predictors, potential confounders, and effect modifiers. Give diagnostic criteria, if applicable                                                                     | 4,5     |
| Data sources/<br>measurement | 8*      | For each variable of interest, give sources of data and details of methods of assessment (measurement). Describe comparability of assessment methods if there is more than one group                         | 4       |
| Bias                         | 9       | Describe any efforts to address potential sources of bias                                                                                                                                                    | 5       |
| Study size                   | 10      | Explain how the study size was arrived at                                                                                                                                                                    | 4       |
| Quantitative variables       | 11      | Explain how quantitative variables were handled in the analyses. If applicable, describe which groupings were chosen and why                                                                                 | 4,5     |
| Statistical methods          | 12      | (a) Describe all statistical methods, including those used to control for confounding                                                                                                                        | 5       |
|                              |         | (b) Describe any methods used to examine subgroups and interactions                                                                                                                                          | N/A     |
|                              |         | (c) Explain how missing data were addressed                                                                                                                                                                  | 4       |
|                              |         | (d) If applicable, describe analytical methods taking account of sampling strategy                                                                                                                           | 5       |
|                              |         | (e) Describe any sensitivity analyses                                                                                                                                                                        | 5       |
| <b>Results</b>               |         |                                                                                                                                                                                                              |         |
| Participants                 | 13*     | (a) Report numbers of individuals at each stage of study—eg numbers potentially eligible, examined for eligibility, confirmed eligible, included in the study, completing follow-up, and analysed            | 4       |
|                              |         | (b) Give reasons for non-participation at each stage                                                                                                                                                         | 4       |
|                              |         | (c) Consider use of a flow diagram                                                                                                                                                                           | N/A     |
| Descriptive data             | 14*     | (a) Give characteristics of study participants (eg demographic, clinical, social) and information on exposures and potential confounders                                                                     | 5,9     |
|                              |         | (b) Indicate number of participants with missing data for each variable of interest                                                                                                                          | N/A     |
| Outcome data                 | 15*     | Report numbers of outcome events or summary measures                                                                                                                                                         | 10      |
| Main results                 | 16      | (a) Give unadjusted estimates and, if applicable, confounder-adjusted estimates and their precision (eg, 95% confidence interval). Make clear which confounders were adjusted for and why they were included | 11      |

|                          |    |                                                                                                                                                                            |     |
|--------------------------|----|----------------------------------------------------------------------------------------------------------------------------------------------------------------------------|-----|
|                          |    | (b) Report category boundaries when continuous variables were categorized                                                                                                  | N/A |
|                          |    | (c) If relevant, consider translating estimates of relative risk into absolute risk for a meaningful time period                                                           | N/A |
| Other analyses           | 17 | Report other analyses done—eg analyses of subgroups and interactions, and sensitivity analyses                                                                             | 6   |
| <b>Discussion</b>        |    |                                                                                                                                                                            |     |
| Key results              | 18 | Summarise key results with reference to study objectives                                                                                                                   | 6   |
| Limitations              | 19 | Discuss limitations of the study, taking into account sources of potential bias or imprecision. Discuss both direction and magnitude of any potential bias                 | 7   |
| Interpretation           | 20 | Give a cautious overall interpretation of results considering objectives, limitations, multiplicity of analyses, results from similar studies, and other relevant evidence | 6-8 |
| Generalisability         | 21 | Discuss the generalisability (external validity) of the study results                                                                                                      | 7,8 |
| <b>Other information</b> |    |                                                                                                                                                                            |     |
| Funding                  | 22 | Give the source of funding and the role of the funders for the present study and, if applicable, for the original study on which the present article is based              | 1   |

\*Give information separately for exposed and unexposed groups.

**Note:** An Explanation and Elaboration article discusses each checklist item and gives methodological background and published examples of transparent reporting. The STROBE checklist is best used in conjunction with this article (freely available on the Web sites of PLoS Medicine at <http://www.plosmedicine.org/>, Annals of Internal Medicine at <http://www.annals.org/>, and Epidemiology at <http://www.epidem.com/>). Information on the STROBE Initiative is available at [www.strobe-statement.org](http://www.strobe-statement.org).
