# Supplementary material for: Cross-sectional analysis of the association between household food insecurity and mental health conditions in children aged 5–11 years in Canada
Source: PubMed Central journal article supplement — BMJ Open. 2024 Jun 25;14(6):e081538. doi: 10.1136/bmjopen-2023-081538 (PMC11202637; doi:10.1136/bmjopen-2023-081538), 2024-06-25
Supplement: bmjopen-2023-081538supp001.pdf [file bmjopen-2023-081538supp001.pdf]

**Supplementary Table 1: Unadjusted and adjusted logistic regression models of the association between household food insecurity and any diagnosed mental health condition**

| Variable                                                   | Unadjusted OR (95% CI) | Adjusted OR (95% CI) |
|------------------------------------------------------------|------------------------|----------------------|
| <b>Household Food Security</b>                             |                        |                      |
| Food Secure                                                | REF                    | REF                  |
| Food Insecure (marginal, moderate, or severe)              | 2.05 (1.72, 2.44)      | 1.49 (1.22, 1.82)    |
| Age (years)                                                | 1.24 (1.20, 1.29)      | 1.25 (1.21, 1.30)    |
| <b>Sex</b>                                                 |                        |                      |
| Female                                                     | REF                    | REF                  |
| Male                                                       | 2.44 (2.08, 2.87)      | 2.70 (2.29, 3.19)    |
| Household Income (adjusted for household size, per \$5000) | 0.96 (0.94, 0.98)      | 0.99 (0.97, 1.01)    |
| <b>Highest Level Parent Education</b>                      |                        |                      |
| High school or less                                        | REF                    | REF                  |
| College/Trades                                             | 0.80 (0.65, 0.98)      | 0.96 (0.78, 1.19)    |
| University or more                                         | 0.49 (0.40, 0.60)      | 0.79 (0.63, 1.01)    |
| <b>Parent's Mental Health Status</b>                       |                        |                      |
| Excellent/Very good                                        | REF                    | REF                  |
| Good                                                       | 2.33 (1.96, 2.77)      | 1.95 (1.63, 2.34)    |
| Fair/Poor                                                  | 4.34 (3.45, 5.46)      | 3.66 (2.84, 4.70)    |
| <b>Race and ethnic origin</b>                              |                        |                      |
| White/non-racialized                                       | REF                    | REF                  |
| Black                                                      | 0.79 (0.57, 1.09)      | 0.83 (0.58, 1.18)    |
| East Asian                                                 | 0.58 (0.39, 0.86)      | 0.78 (0.51, 1.18)    |
| Indigenous                                                 | 1.58 (1.20, 2.10)      | 1.11 (0.82, 1.48)    |
| Latin American                                             | 0.56 (0.25, 1.24)      | 0.66 (0.29, 1.49)    |
| Other/Multiple                                             | 0.74 (0.42, 1.28)      | 0.67 (0.37, 1.19)    |
| South Asian                                                | 0.29 (0.19, 0.43)      | 0.42 (0.28, 0.64)    |
| Southeast Asian/Filipino                                   | 0.53 (0.33, 0.85)      | 0.68 (0.41, 1.13)    |
| West Asian/Arab                                            | 0.35 (0.17, 0.71)      | 0.47 (0.21, 1.02)    |
| <b>Immigration Status</b>                                  |                        |                      |
| Non-immigrant                                              | REF                    | REF                  |
| Immigrant/non-permanent resident                           | 0.35 (0.24, 0.52)      | 0.47 (0.31, 0.72)    |
| <b>Divorce/Separation</b>                                  |                        |                      |
| No                                                         | REF                    | REF                  |
| Yes                                                        | 2.26 (1.90, 2.68)      | 1.47 (1.22, 1.78)    |
